# Supplementary material for: Mutational and Bioinformatic Analysis of Haloarchaeal Lipobox-Containing Proteins
Source: Hindawi journal article supplement (doi:10.1155/2010/410975), 2010-01-01
Supplement: f1 [file 410975.f1.pdf]

**Supplementary Table 1. Strains and Plasmids**

| Strain/Plasmid | Relevant properties                                                                                                                                                                                                                                                                                  | Reference  |
|----------------|------------------------------------------------------------------------------------------------------------------------------------------------------------------------------------------------------------------------------------------------------------------------------------------------------|------------|
| Strain         |                                                                                                                                                                                                                                                                                                      |            |
| DH5alpha       | <i>E. coli</i> $\Phi$ 80 <i>lacZ</i> $\Delta$ M15 ( <i>argF-lac</i> ) U169 <i>recA</i> <i>l</i> <i>endA</i> <i>1</i> <i>hsdR</i> <i>17</i> ( <i>r</i> <sup>+</sup> <i>m</i> <sup>+</sup> )<br><i>supE</i> <i>44</i> <sup>+</sup> <i>thi-1</i> <i>gyrA</i> <i>96</i> <i>relA</i> <i>1</i> <i>phoA</i> | Invitrogen |
| DL739          | <i>E. coli</i> MC4100 <i>dam-13::Tn9</i>                                                                                                                                                                                                                                                             | [20]       |
| H99            | <i>Hfx. volcanii</i> DS70 $\Delta$ <i>pyrE2</i> $\Delta$ <i>hdrB</i> $\Delta$ <i>trpA</i>                                                                                                                                                                                                            | [21]       |
| KD5            | H99 $\Delta$ <i>tatAo::trpA</i> <sup>+</sup>                                                                                                                                                                                                                                                         | [22]       |
| KD23           | H99 containing pKD13                                                                                                                                                                                                                                                                                 | [12]       |
| KD26           | H99 containing pKD17                                                                                                                                                                                                                                                                                 | [12]       |
| KD27           | H99 containing pKD18                                                                                                                                                                                                                                                                                 | [12]       |
| KD32           | H99 containing pKD23                                                                                                                                                                                                                                                                                 | [12]       |
| KD35           | H99 containing pKD26                                                                                                                                                                                                                                                                                 | [12]       |
| KD37           | H99 containing pKD28                                                                                                                                                                                                                                                                                 | [12]       |
| ST91           | H99 containing pST10                                                                                                                                                                                                                                                                                 | this study |
| ST96           | H99 containing pST11                                                                                                                                                                                                                                                                                 | this study |
| ST101          | H99 containing pST12                                                                                                                                                                                                                                                                                 | this study |
| ST106          | KD5 containing pST10                                                                                                                                                                                                                                                                                 | this study |
| ST107          | H99 containing pST6                                                                                                                                                                                                                                                                                  | this study |
| ST111          | H99 containing pST7                                                                                                                                                                                                                                                                                  | this study |
| ST114          | H99 containing pST8                                                                                                                                                                                                                                                                                  | this study |
| ST118          | KD5 containing pST6                                                                                                                                                                                                                                                                                  | this study |
| ST126          | H99 containing pST17                                                                                                                                                                                                                                                                                 | this study |
| ST128          | H99 containing pST18                                                                                                                                                                                                                                                                                 | this study |
| ST135          | H99 containing pST14                                                                                                                                                                                                                                                                                 | this study |
| ST137          | H99 containing pST15                                                                                                                                                                                                                                                                                 | this study |
| ST139          | H99 containing pST16                                                                                                                                                                                                                                                                                 | this study |
| ST167          | H99 containing pST19                                                                                                                                                                                                                                                                                 | this study |
| ST168          | KD5 containing pST11                                                                                                                                                                                                                                                                                 | this study |
| ST171          | KD5 containing pST7                                                                                                                                                                                                                                                                                  | this study |
| ST176          | KD5 containing pKD28                                                                                                                                                                                                                                                                                 | this study |
| ST177          | KD5 containing pKD26                                                                                                                                                                                                                                                                                 | this study |
| ST178          | KD5 containing pKD13                                                                                                                                                                                                                                                                                 | this study |
| ST179          | KD5 containing pKD17                                                                                                                                                                                                                                                                                 | this study |
| ST180          | KD5 containing pKD23                                                                                                                                                                                                                                                                                 | this study |
| SI44           | H99 containing pSI44                                                                                                                                                                                                                                                                                 | this study |
| SI45           | H99 containing pSI45                                                                                                                                                                                                                                                                                 | this study |
| Plasmid        |                                                                                                                                                                                                                                                                                                      |            |
| pMLH3          | ( <i>Amp</i> <sup>r</sup> , <i>Nb</i> <sup>r</sup> , <i>Mev</i> <sup>r</sup> ) <i>H. volcanii</i> - <i>E. coli</i> shuttle vector                                                                                                                                                                    | [18]       |
| pST6           | P <sub>fdx</sub> <i>Hvo1242-myc</i> cloned into pMLH3 replacing <i>Mev</i> <sup>r</sup> cassette                                                                                                                                                                                                     | this study |
| pST7           | P <sub>fdx</sub> <i>Hvo1242C26S-myc</i> cloned into pMLH3 replacing <i>Mev</i> <sup>r</sup> cassette                                                                                                                                                                                                 | this study |
| pST8           | P <sub>fdx</sub> <i>Hvo1242KK-myc</i> cloned into pMLH3 replacing <i>Mev</i> <sup>r</sup> cassette                                                                                                                                                                                                   | this study |
| pST10          | P <sub>fdx</sub> <i>HvoB0139-myc</i> cloned into pMLH3 replacing <i>Mev</i> <sup>r</sup> cassette                                                                                                                                                                                                    | this study |
| pST11          | P <sub>fdx</sub> <i>HvoB0139C21S-myc</i> cloned into pMLH3 replacing <i>Mev</i> <sup>r</sup> cassette                                                                                                                                                                                                | this study |
| pST12          | P <sub>fdx</sub> <i>HvoB0139KK-myc</i> cloned into pMLH3 replacing <i>Mev</i> <sup>r</sup> cassette                                                                                                                                                                                                  | this study |
| pST14          | P <sub>fdx</sub> <i>Hvo1808-myc</i> cloned into pMLH3 replacing <i>Mev</i> <sup>r</sup> cassette                                                                                                                                                                                                     | this study |
| pST15          | P <sub>fdx</sub> <i>Hvo1808C19S-myc</i> cloned into pMLH3 replacing <i>Mev</i> <sup>r</sup> cassette                                                                                                                                                                                                 | this study |
| pST16          | P <sub>fdx</sub> $\Delta$ <i>ssHvo1808-myc</i> cloned into pMLH3 replacing <i>Mev</i> <sup>r</sup> cassette                                                                                                                                                                                          | this study |
| pST17          | P <sub>fdx</sub> <i>Hvo1580-myc</i> cloned into pMLH3 replacing <i>Mev</i> <sup>r</sup> cassette                                                                                                                                                                                                     | this study |
| pST18          | P <sub>fdx</sub> <i>Hvo1580C19S-myc</i> cloned into pMLH3 replacing <i>Mev</i> <sup>r</sup> cassette                                                                                                                                                                                                 | this study |
| pST19          | P <sub>fdx</sub> $\Delta$ <i>ssHvo1580-myc</i> cloned into pMLH3 replacing <i>Mev</i> <sup>r</sup> cassette                                                                                                                                                                                          | this study |
| pKD13          | P <sub>fdx</sub> - <i>exo-arabinanase-myc</i> cloned into pMLH3 replacing <i>Mev</i> <sup>r</sup> cassette                                                                                                                                                                                           | [12]       |
| pKD17          | P <sub>fdx</sub> - <i>DsbA-myc</i> cloned into pMLH3 replacing <i>Mev</i> <sup>r</sup> cassette                                                                                                                                                                                                      | [12]       |
| pKD18          | P <sub>fdx</sub> - <i>DsbAKK-myc</i> cloned into pMLH3 replacing <i>Mev</i> <sup>r</sup> cassette                                                                                                                                                                                                    | [12]       |
| pKD23          | P <sub>fdx</sub> - <i>Ibp-myc</i> cloned into pMLH3 replacing <i>Mev</i> <sup>r</sup> cassette                                                                                                                                                                                                       | [12]       |
| pKD26          | P <sub>fdx</sub> - <i>IbpCxS-myc</i> cloned into pMLH3 replacing <i>Mev</i> <sup>r</sup> cassette                                                                                                                                                                                                    | [12]       |
| pKD28          | P <sub>fdx</sub> - <i>DsbAC22S-myc</i> cloned into pMLH3 replacing <i>Mev</i> <sup>r</sup> cassette                                                                                                                                                                                                  | [12]       |
| pRV1-ptna      | ( <i>Amp</i> <sup>r</sup> , <i>Nb</i> <sup>r</sup> ) <i>H. volcanii</i> - <i>E. coli</i> shuttle vector                                                                                                                                                                                              | [19]       |

|       |                                                                                             |            |
|-------|---------------------------------------------------------------------------------------------|------------|
| pSI44 | <i>Hvo0494-his</i> cloned into pRV1- <i>ptna</i> via <i>NdeI/EcoRI</i> restriction sites    | this study |
| pSI45 | <i>Hvo0494C20S-is</i> cloned into pRV1- <i>ptna</i> via <i>NdeI/EcoRI</i> restriction sites | this study |
