# Supplementary material for: Mutational and Bioinformatic Analysis of Haloarchaeal Lipobox-Containing Proteins
Source: Hindawi journal article supplement (doi:10.1155/2010/410975), 2010-01-01
Supplement: f2 [file 410975.f2.pdf]

**Supplementary Table 2. Primers used for PCR amplification**

| Primer name     | Sequence                                                                   | Target sequence                                                                              |
|-----------------|----------------------------------------------------------------------------|----------------------------------------------------------------------------------------------|
| 703fdxOLfor     | agccgaactctgcagccatgttcgacgggtctccg                                        | 1 bp downstream of Hvo1242 start codon - extension towards stop codon of Hvo1242             |
| 703mycrev       | ggttcagaagctttacagatcctcttcagagatgagttt<br>ctgctcgccgtccagccccggaac        | 1 bp upstream of Hvo1242 stop codon - extension towards start codon of Hvo1242               |
| 703CSfor        | gcggcgctctccgctccctcgacagggca                                              | 67 bp downstream of Hvo1242 start codon - extension towards stop codon of Hvo1242            |
| 703Csrev        | tgccctgtcgaggaggcggagagcgccgc                                              | 93 bp downstream of Hvo1242 start codon - extension towards start codon of Hvo1242           |
| KKfor703        | gggtctccgtccaagaaggagtctctgaag                                             | 10 bp downstream of Hvo1242 start codon - extension towards stop codon of Hvo1242            |
| KKrev703        | cttcaggaactccttcttgacggagaccc                                              | 39 bp downstream of Hvo1242 start codon - extension towards start codon of Hvo1242           |
| B197fdxOLfor    | agccgaactctgcagccatgtctccagacgagagg                                        | 1 bp downstream of HvoB0139 start codon - extension towards stop codon of HvoB0139           |
| B197mycrev      | ggttcagaagctttacagatcctcttcagagatgagttt<br>ctgctctgcgaccttaccacccc         | 1 bp upstream of HvoB0139 stop codon - extension towards start codon of HvoB0139             |
| B197CSfor       | agcgggggtcgctggctccggcggttcgctg                                            | 49 bp downstream of HvoB0139 start codon - extension towards stop codon of HvoB0139          |
| B197CSrev       | cgacgaaccgcccggagccagcgaccccgt                                             | 78 bp downstream of HvoB0139 start codon - extension towards start codon of HvoB0139         |
| KKforB197       | atgatgctctccaagaaggagtactggcc                                              | 1 bp downstream of HvoB0139 start codon - extension towards stop codon of HvoB0139           |
| KKrevB197       | ggccagtacctcttcttgagagcatcat                                               | 30 bp downstream of HvoB0139 start codon - extension towards start codon of HvoB0139         |
| 134fdxOLfor     | agccgaactctgcagccatgcgaaccaccggtctc                                        | 1 bp downstream of Hvo1808 start codon - extension towards stop codon of Hvo1808             |
| 134mycrev       | ggttcagaagctttacagatcctcttcagagatgagttt<br>ctgctcgccggcgagtcggcgccg        | 1 bp upstream of Hvo1808 stop codon - extension towards start codon of Hvo1808               |
| fdxOLdeltaSS134 | agccgaactctgcagccatgtgtgccccccacggct                                       | 58 bp downstream of Hvo1808 start codon - extension towards stop codon of Hvo1808            |
| 134Csfor        | ttggttctcgccggtctgcgccccccacg                                              | 43 bp downstream of Hvo1808 start codon - extension towards stop codon of Hvo1808            |
| 134Csrev        | cgtggggggcgccagagccggcgagaaacaa                                            | 72 bp downstream of Hvo1808 start codon - extension towards start codon of Hvo1808           |
| ORF354fdxOLfor  | agccgaactctgcagccatgtcgccccgcccgac                                         | 1 bp downstream of Hvo1580 start codon - extension towards stop codon of Hvo1580             |
| ORF354mycrev    | ggttcagaagcttttacagatcctctcgtgatgagctt<br>ctgctcctcgccggccaccgatggaa       | 1 bp upstream of Hvo1580 stop codon - extension towards start codon of Hvo1580               |
| fdxOLdelss354   | ccgaactctgcagccatgtgtacgtctcatcg                                           | 73 bp downstream of Hvo1580 start codon - extension towards stop codon of Hvo1580            |
| ORF354CSfor     | gtgtactctcggggtctacgtctcatcg                                               | 58 bp downstream of Hvo1580 start codon - extension towards stop codon of Hvo1580            |
| ORF354CSrev     | cgatgaggacgtagaccccgagagtaccac                                             | 87 bp downstream of Hvo1580 start codon - extension towards start codon of Hvo1580           |
| ForFdx          | gtaacgccagggttttc                                                          | 199 bp upstream of pyrE2 start codon on pGB70 - extension towards pyrE2 gene                 |
| RevFdx          | catggctgcagagttcggt                                                        | pyrE2 start codon - extension away from pyrE2 start codon                                    |
| Hvo_0494 for    | agtccatatgtactccaaccgcattcc                                                | 1bp downstream of the Hvo0494 start codon – extension towards the stop codon of Hvo0494      |
| Hvo_0494 CSfor  | agtccatatgtactccaaccgcattcccgcttacttatcg<br>cagtctctgctgtctcgccgggtccggcgc | 1bp downstream of the Hvo_0494 start codon – extension towards the stop codon of Hvo_0494.   |
| Hvo_0494 ΔSS    | agtccatatgtccgcccggcgccggatgt                                              | 58 bp downstream of the Hvo_0494 start codon - extension towards the stop codon of Hvo_0494. |
| Hvo_0494hisrev  | gaccgaattctcagtggtggtggtggtggtgcgcccgc<br>gcttcgtcgagcc                    | 1 bp upstream of Hvo0494 stop codon - extension towards start codon of Hvo0494               |
