# Supplementary material for: Mutational and Bioinformatic Analysis of Haloarchaeal Lipobox-Containing Proteins
Source: Hindawi journal article supplement (doi:10.1155/2010/410975), 2010-01-01
Supplement: f3 [file 410975.f3.pdf]

### Supplementary Table 3: *in silico* secretome analysis for archaea

The secretome was analyzed for several archaeal groups: 6 halophilic archaea (H), 9 non-halophilic euryarchaea (E), 9 crenarchaea (C) and 3 other archaea (OA). The organism abbreviations as given in Figure 5, the organism name, and the TaxID (<http://www.ncbi.nlm.nih.gov/Taxonomy>) and the total number of proteins (proteins (nr)) are given. Secreted proteins (secreted), Tat (Tat) and Sec (Sec) substrates, and lipoproteins (Lipo) were counted as described in Materials and Methods. Several combinations thereof (Tat+Lipo, Sec+Lipo) are shown. Relative contributions were computed as indicated in the column headers and are shown as % values.

| archaeal group | abbreviation | organism name                            | taxid  | proteins<br>(nr) | secreted<br>(nr) | Tat<br>(nr) | Sec<br>(nr) | Lipo<br>(nr) | Tat+Lipo<br>(nr) | Sec+Lipo<br>(nr) | secreted% proteins<br>(%) | Tat % secreted<br>(%) | Lipo% secreted<br>(%) | Tat+Lipo% Tat<br>(%) | Sec+Lipo% Sec<br>(%) | Tat+Lipo% Lipo<br>(%) |
|----------------|--------------|------------------------------------------|--------|------------------|------------------|-------------|-------------|--------------|------------------|------------------|---------------------------|-----------------------|-----------------------|----------------------|----------------------|-----------------------|
| H              | Hamar        | <i>Haloarcula marismortui</i> ATCC 43049 | 272569 | 4289             | 356              | 154         | 202         | 115          | 90               | 25               | 8.3                       | 43.3                  | 32.3                  | 58.4                 | 12.4                 | 78.3                  |
| H              | Hasal        | <i>Halobacterium salinarum</i> R1        | 478009 | 2832             | 179              | 70          | 109         | 47           | 37               | 10               | 6.3                       | 39.1                  | 26.3                  | 52.9                 | 9.2                  | 78.7                  |
| H              | Hfvol        | <i>Haloferax volcanii</i> DS2            | 309800 | 4077             | 297              | 122         | 175         | 93           | 77               | 16               | 7.3                       | 41.1                  | 31.3                  | 63.1                 | 9.1                  | 82.8                  |
| H              | Hqwal        | <i>Haloquadratum walsbyi</i> DSM 16790   | 362976 | 2841             | 138              | 65          | 73          | 46           | 39               | 7                | 4.9                       | 47.1                  | 33.3                  | 60                   | 9.6                  | 84.8                  |
| H              | Namag        | <i>Natrialba magadii</i> ATCC 43099      | 547559 | 4212             | 352              | 195         | 157         | 106          | 90               | 16               | 8.4                       | 55.4                  | 30.1                  | 46.2                 | 10.2                 | 84.9                  |
| H              | Napha        | <i>Natronomonas pharaonis</i> DSM 2160   | 348780 | 2850             | 215              | 102         | 113         | 77           | 67               | 10               | 7.5                       | 47.4                  | 35.8                  | 65.7                 | 8.8                  | 87                    |
| E              | Arcfu        | <i>Archaeoglobus fulgidus</i> DSM 4304   | 224325 | 2420             | 187              | 8           | 179         | 24           | 1                | 23               | 7.7                       | 4.3                   | 12.8                  | 12.5                 | 12.8                 | 4.2                   |
| E              | Mmaze        | <i>Methanosarcina mazei</i> Goe1         | 192952 | 3370             | 214              | 5           | 209         | 38           | 0                | 38               | 6.4                       | 2.3                   | 17.8                  | -                    | 18.2                 | -                     |
| E              | Pyrfu        | <i>Pyrococcus furiosus</i> DSM 3638      | 186497 | 2125             | 160              | 2           | 158         | 18           | 0                | 18               | 7.5                       | 1.3                   | 11.3                  | -                    | 11.4                 | -                     |
| E              | Thkod        | <i>Thermococcus kodakarensis</i> KOD1    | 69014  | 2306             | 206              | 2           | 204         | 31           | 0                | 31               | 8.9                       | 1                     | 15.0                  | -                    | 15.2                 | -                     |
| E              | Methu        | <i>Methanospirillum hungatei</i> JF-1    | 323259 | 3139             | 335              | 0           | 335         | 24           | 0                | 24               | 10.7                      | -                     | 7.2                   | -                    | 7.2                  | -                     |

|    |       |                                               |        |      |     |    |     |    |   |    |     |     |      |   |      |   |
|----|-------|-----------------------------------------------|--------|------|-----|----|-----|----|---|----|-----|-----|------|---|------|---|
| E  | Metja | <i>Methanocaldococcus jannaschii</i> DSM 2661 | 243232 | 1786 | 97  | 0  | 97  | 19 | 0 | 19 | 5.4 | -   | 19.6 | - | 19.6 | - |
| E  | Metka | <i>Methanopyrus kandleri</i> AV19             | 190192 | 1687 | 137 | 0  | 137 | 0  | - | -  | 8.1 | -   | -    | - | -    | - |
| E  | Picto | <i>Picrophilus torridus</i> DSM 9790          | 263820 | 1535 | 60  | 2  | 58  | 0  | - | -  | 3.9 | 3.3 | -    | - | -    | - |
| E  | Theac | <i>Thermoplasma acidophilum</i> DSM 1728      | 273075 | 1482 | 60  | 3  | 57  | 0  | - | -  | 4.1 | 5   | -    | - | -    | - |
| C  | Apern | <i>Aeropyrum pernix</i> K1                    | 272557 | 1700 | 102 | 8  | 94  | 0  | - | -  | 6   | 7.8 | -    | - | -    | - |
| C  | Calma | <i>Caldivirga maquilingensis</i> IC-167       | 397948 | 1963 | 105 | 7  | 98  | 0  | - | -  | 5.4 | 6.7 | -    | - | -    | - |
| C  | Hypbu | <i>Hyperthermus butylicus</i> DSM 5456        | 415426 | 1602 | 100 | 5  | 95  | 0  | - | -  | 6.2 | 5   | -    | - | -    | - |
| C  | Sulac | <i>Sulfolobus acidocaldarius</i> DSM 639      | 330779 | 2223 | 81  | 4  | 77  | 0  | - | -  | 3.6 | 4.9 | -    | - | -    | - |
| C  | Sulso | <i>Sulfolobus solfataricus</i> P2             | 273057 | 2977 | 129 | 4  | 125 | 0  | - | -  | 4.3 | 3.1 | -    | - | -    | - |
| C  | Thneu | <i>Thermoproteus neutrophilus</i> V24Sta      | 444157 | 1966 | 176 | 9  | 167 | 0  | - | -  | 9   | 5.1 | -    | - | -    | - |
| C  | Metse | <i>Metallosphaera sedula</i> DSM 5348         | 399549 | 2256 | 96  | 4  | 92  | 1  | 0 | 1  | 4.3 | 4.2 | 1    | - | 1.1  | - |
| C  | Pyrar | <i>Pyrobaculum arsenaticum</i> DSM 13514      | 340102 | 2299 | 209 | 13 | 196 | 1  | 0 | 1  | 9.1 | 6.2 | 0.5  | - | 0.5  | - |
| C  | Ighos | <i>Ignicoccus hospitalis</i> Kin4-I           | 453591 | 1434 | 120 | 4  | 116 | 5  | 0 | 5  | 8.4 | 3.3 | 4.2  | - | 4.3  | - |
| OA | Nequi | <i>Nanoarchaeum equitans</i> Kin4-M           | 228908 | 536  | 34  | 0  | 34  | 1  | 0 | 1  | 6.3 | -   | 2.9  | - | 2.9  | - |
| OA | Kocry | <i>Korarchaeum cryptofilum</i> OPF8           | 374847 | 1602 | 120 | 3  | 117 | 1  | 0 | 1  | 7.5 | 2.5 | 0.8  | - | 0.9  | - |
| OA | Nitma | <i>Nitrosopumilus maritimus</i> SCM1          | 436308 | 1795 | 163 | 0  | 163 | 0  | - | -  | 9.1 | -   | -    | - | -    | - |
