# Supplementary material for: Mutational and Bioinformatic Analysis of Haloarchaeal Lipobox-Containing Proteins
Source: Hindawi journal article supplement (doi:10.1155/2010/410975), 2010-01-01
Supplement: f4 [file 410975.f4.pdf]

#### Supplementary Table 4: Alignment of 484 lipobox-containing proteins from halophilic archaea

The N-terminal region of the 484 lipoproteins from 6 halophilic archaea is shown. Proteins are named by their ordered locus tag obtained upon genome annotation (code). Each of the proteins was positive in at least two of the three predictors (lipobox prediction: A: Prosite PS51257; B: lipoP; C: predLipo). The first 400 proteins are TatFind positive (“T”), the last 84 are TatFind negative (“-”). All TatFind positives and the first 50 of the TatFind negatives have a twin-Arg motif (“RR”) while the last 34 TatFind negatives lack a twin-Arg motif (“-”). The twin-Arg motif and the lipobox motif were juxtaposed by introducing a gap of variable length between positions 5 and 6 after the twin-Arg motif. Spaces were added on both sides of the twin-Arg motif and of the lipobox to increase readability. If there were three or more consecutive Arg residues in the twin-Arg motif, the positioning is according to TatFind, which is based on the detection of a conserved pair of hydrophobic residues at position +2/+3. Dashes indicate the single gap of variable length introduced between position +5 and +6 after the twin-Arg motif and also the region in front of the initiator-Met.

| code    | N-terminal sequence                                      | lipobox prediction | TatFind | twin-Arg |
|---------|----------------------------------------------------------|--------------------|---------|----------|
| pNG2038 | -----MTERT RR QLLAG-----IGTSLTLA TAGC GGNSGSGGSN         | A,B,C              | T       | RR       |
| pNG3012 | -----MK RR NLLSA-----LGTSVA LAGC STSTNSTETN              | A,B,C              | T       | RR       |
| pNG5085 | -----MTHKNIPRNSSID RR TVLGL-----LSGSLAA LAGC SGGLSDSGDG  | A,B,C              | T       | RR       |
| pNG6063 | -----ME RR QVLKT---AGILATGGVTG LAGC SSSGNGDGGG           | A,B,C              | T       | RR       |
| pNG6067 | -----MTTRFGAPGTGLS RR EFLAA-----TGATGIAS LAGC SAGGANEPAA | A,B,C              | T       | RR       |
| pNG7023 | -----MTNSN RR KFLKA-----TGVGLLGG LAGC TRGGDSSGGD         | A,B,C              | T       | RR       |
| pNG7073 | -----MD RR TFLAA-----SGLTVAGT LAGC SAPSDNQQRD            | A,B,C              | T       | RR       |
| pNG7088 | -----MPSTS RR TFLGM-----VATGTVAS VAGC SSTCPDEGAP         | A,B,C              | T       | RR       |

|           |                    |     |                     |           |            |            |       |    |    |
|-----------|--------------------|-----|---------------------|-----------|------------|------------|-------|----|----|
| pNG7122   | -----MNRSSVS       | RR  | QFLGA-----          | SGAALVTG  | LAGC       | SAGEGGTSTD | A,B,C | T  | RR |
| pNG7185   | -----MHQLH         | RR  | QLLGV-----          | VCSGLTV   | LAGC       | GSDQSGNSSE | A,B,C | T  | RR |
| pNG7190   | -----MDKADDSNGLT   | RR  | DYLSG-----          | GSVLLGTST | VAGC       | SGDGGESPST | A,B,C | T  | RR |
| pNG7250   | -----MVNTNRTIS     | RR  | EMLGA-----          | LGATGVTA  | LAGC       | SGGSDDTDTA | A,B,C | T  | RR |
| pNG7251   | -----MVDKKHTRS     | RR  | ELLTA-----          | LGAAGITG  | LAGC       | SGGGDGGDGE | A,B,C | T  | RR |
| pNG7384   | -----MVPST         | RR  | TLLHS-----          | VCGLATV   | LAGC       | SGVFESSGES | A,B,C | T  | RR |
| rrnAC0147 | -----MD            | RR  | SFLTA-----          | AGATVSVS  | FAGC       | AGLGGSESS  | A,B,C | T  | RR |
| rrnAC0158 | -----MN            | RR  | QFLAS-----          | AGLAGTTV  | LAGC       | GSLSSQSTRA | A,B,C | T  | RR |
| rrnAC0296 | -----MKQSLT        | RR  | AMLGA-----          | LGTAVAA   | TAGC       | QSPGTGSDSG | A,B,C | T  | RR |
| rrnAC0358 | -----MFRNDKHSLSVSK | RR  | SFLKM-----          | VGTAAGL   | LAGC       | GGDSGSGDGG | A,B,C | T  | RR |
| rrnAC0381 | -----MPREARVD      | RRR | YLQA-----           | IGGTVATLS | VAGC       | QSDSGDSQTL | A,B,C | T  | RR |
| rrnAC0389 | -----MET           | RR  | TFVRG-----          | LGLAAGVA  | LAGC       | SSGGGSDSGD | A,B,C | T  | RR |
| rrnAC0498 | -----MPS           | RR  | SVLTA-----          | GTLVA     | LSGC       | AALSPASARL | A,B,C | T  | RR |
| rrnAC0508 | -----MTNDLD        | RR  | TFIRT-----          | TAAVSGAGL | LAGC       | GGSGGDGGSD | A,B,C | T  | RR |
| rrnAC0566 | -----MQNTAT        | RRR | VLGA-----           | LGAGVVG   | LSGC       | VSDSSMTEQ  | A,B,C | T  | RR |
| rrnAC0576 | -----MSSDTT        | RRR | ILLGI-----          | GTGVTVG   | IAGC       | SGGGNGGAE  | A,B,C | T  | RR |
| rrnAC0830 | -----MSSDTN        | RR  | AFLKR--TGAVTTVGLLGG | LAGC      | STEQTGGDGG | A,B,C      | T     | RR |    |
| rrnAC0850 | -----MTQ-RR-AT     | RRR | FLMG-----           | CSAIASVG  | LAGC       | TGGDESTATD | A,B,C | T  | RR |
| rrnAC0856 | -----MTRFT         | RR  | GLLAA-----          | TVGAVGA   | MAGC       | AGGSSESESA | A,B,C | T  | RR |
| rrnAC0899 | -----MN            | RR  | EYIVA-----          | AGVGLAGT  | VAGC       | SGQSEAGSGS | A,B,C | T  | RR |
| rrnAC0998 | -----MLRTT         | RRR | LLSA-----           | LGASLSI   | LAGC       | TQFDVESGAE | A,B,C | T  | RR |
| rrnAC1082 | -----MD            | RR  | TYIGT-----          | IGSSMAALS | LAGC       | SGSDGGDGNE | A,B,C | T  | RR |
| rrnAC1892 | -----MN            | RRR | FLTL-----           | SGVGTVGA  | VAGC       | SSEADSAESV | A,B,C | T  | RR |
| rrnAC1944 | -----MEFEST        | RRR | FMQL-----           | AGTGATVS  | LAGC       | NALQGGSDG  | A,B,C | T  | RR |
| rrnAC2421 | -----MRNPCRARS     | RR  | QYLAA-----          | LGGIGATA  | LAGC       | RGESGTQTEP | A,B,C | T  | RR |
| rrnAC2469 | -----MNEHDTRSID    | RR  | SVIKA-----          | AASAGLVG  | LAGC       | SGGAPDEGDG | A,B,C | T  | RR |
| rrnAC2580 | -----MTNNST        | RRR | FLKT-----           | AGVAGVAA  | LAGC       | GGGGDGGDGG | A,B,C | T  | RR |
| rrnAC2656 | -----MSQ           | RRR | TFISS-----          | VGTATAIG  | LAGC       | LGGDGGDGGG | A,B,C | T  | RR |

|           |                                                           |       |   |    |
|-----------|-----------------------------------------------------------|-------|---|----|
| rrnAC2761 | -----MRNHNIT RR QLLAS-----GGAAATAA LAGC AGGFGGSGQG        | A,B,C | T | RR |
| rrnAC2848 | -----M RRRR FIAT-----GAGVGVGL FAGC SGSSDSGGSD             | A,B,C | T | RR |
| rrnAC2863 | -----MK RR NYIAS-----LGSGLTL LAGC ATGEGSGEGE              | A,B,C | T | RR |
| rrnAC3028 | -----MRDTSQ-RR-S RR GFLGT-----LALAAVT SAGC SSLGGTQNGQ     | A,B,C | T | RR |
| rrnAC3119 | -----MGRPTS RR NVIKI-----AGGALVA LAGC SDTGGSTESD          | A,B,C | T | RR |
| rrnAC3197 | -----MQESSNRT RR TFIKS-----AGVIGAAA LAGC SGGSDSSTED       | A,B,C | T | RR |
| rrnAC3198 | -----MTERGRT RR AFLGT-----LAATTVGS VAGC QSQFNPLAST        | A,B,C | T | RR |
| rrnAC3204 | -----MDRN RR QFLGA-----LTAVVTGT IAGC SGGDSGESSP           | A,B,C | T | RR |
| rrnAC3220 | -----MRDQQQSGTAS RR DYLLA---AGGLAAASTVG LAGC SGSGSETGTL   | A,B,C | T | RR |
| rrnAC3248 | -----M RRR ALLAS-----VPGALAG LAGC SFGTPGSDET              | A,B,C | T | RR |
| rrnAC3267 | -----MPIQ RR EFIAA-----IGTGALAT TAGC AQSSEGSGQT           | A,B,C | T | RR |
| rrnAC3299 | -----MPRSSME RR SFLKA-----TGSAAAAA LAGC SSDSDETEGA        | A,B,C | T | RR |
| rrnAC3315 | -----M RRR QFLAG-----GTVLLSAA VAGC GHPSVVLDM              | A,B,C | T | RR |
| rrnB0022  | -----M RRR QALAL-----VTGSLSL VAGC SSDTTTDLTP              | A,B,C | T | RR |
| rrnB0097  | -----MTSSYS RR TLLRT-----AGVAVAGA VGGC GGDSTAQDMD         | A,B,C | T | RR |
| rrnB0117  | -----MK RR TFLAS-----TGIGLTTA VAGC TTQAGSSDSP             | A,B,C | T | RR |
| rrnB0275  | -----M RRR TYIAS-----GTVMASGL LAGC SSGSSESEST             | A,B,C | T | RR |
| rrnB0319  | -----MSASTMKQNPVD RR SVLKI-----GATALAAG VAGC SQESSQSTET   | A,B,C | T | RR |
| pNG6086   | -----MN RR TFLKQ-----GTALSGGLV LSGC LGRLGFETQS            | A,B,- | T | RR |
| pNG6087   | -----MN RR DVLRA-----VGGTSLVG LAGC TGLFETR SAR            | A,B,- | T | RR |
| pNG7039   | -----MSRYDMNREGPT RR DYMKY-----SGAVVGSSL LAGC AGQSGSEAAP  | A,B,- | T | RR |
| pNG7040   | -----MTDDEKTPHERPT RR DYIKG-----AGIIAGGSL LAGC AGDAVSESTA | A,-,C | T | RR |
| pNG7041   | -----MTDPDRAACEWPT RR DIVRS-----SGALAFGGF LAGC SGESGQESSV | A,-,C | T | RR |
| pNG7059   | -----M RRR TLLKS-----TGAAGTIVG VAGC LGGGRLGDSN            | A,B,- | T | RR |
| pNG7234   | -----MRPT RR EFLGT-----AAALS LSGC LGGTATPTLT              | A,B,- | T | RR |
| rrnAC0082 | -----MDQT RR AVLAG-----VAGL FAGC GTTSQRTTTP               | A,B,- | T | RR |
| rrnAC0299 | -----MSSNSNDQSELT RR EYVTC-----GGTVLAGGL LSGC TGSSGSDPSD  | -,B,C | T | RR |
| rrnAC0460 | -----MPSS RRR YLRG-----CVATLGLA SAGC LGSNGYIETS           | A,B,- | T | RR |

|           |                      |     |                      |      |            |       |   |    |
|-----------|----------------------|-----|----------------------|------|------------|-------|---|----|
| rrnAC0510 | -----MQRPST          | RR  | QFLTG-----TGVAALAI   | TAGC | VSSGSSSEPA | A,B,- | T | RR |
| rrnAC0702 | -----MYSDS           | RR  | GVLKK-----CIAAGSLGL  | SSGC | LGTGGSGDT  | A,B,- | T | RR |
| rrnAC0906 | -----MSDSNDMTGRNATQS | RRR | FLAL-----GSATAATA    | LTGC | SGILSGDDGG | -,B,C | T | RR |
| rrnAC0915 | -----MTDDNSNKRLT     | RR  | NALRI-----AGAAGAAS   | LAGC | GGSDGGDGSS | -,B,C | T | RR |
| rrnAC0957 | -----MSRS            | RR  | TFLT-----LAAASVTLP   | LAGC | AGGDEQSADE | -,B,C | T | RR |
| rrnAC1162 | -----MRIS            | RRR | FLAT-----VGAGVTLG    | GAGC | VGDEGATAGG | A,B,- | T | RR |
| rrnAC1183 | -----MARQT           | RR  | AVLAA-----LGSGIAA    | TAGC | GAFGQERVDV | A,B,- | T | RR |
| rrnAC1260 | -----MN              | RR  | DYLLA-----GATLG TAG  | LAGC | SFLAAAEAPP | A,B,- | T | RR |
| rrnAC1325 | -----MTS             | RR  | GLLLR-----LSALTGAAG  | LSGC | SSLLARQAES | A,B,- | T | RR |
| rrnAC1365 | -----MNRNQT          | RR  | KTLLA-----LGSALSIP   | VAGC | SSGGLFGGET | -,B,C | T | RR |
| rrnAC1430 | -----MD              | RR  | QFLRA-----AGPAAVAG   | LAGC | LGGGSADTDY | A,B,- | T | RR |
| rrnAC1436 | -----MRT             | RR  | TVLVL-----SAGTLC     | LAGC | GSPGDGSNGG | -,B,C | T | RR |
| rrnAC1509 | -----MMTDSPSGGIS     | RRR | FLTS-----SGAIGTLA    | LAGC | VQNTNSGDGS | -,B,C | T | RR |
| rrnAC1654 | -----MN              | RRR | YLT-----STAALSG      | LAGC | LGDPEYTISS | A,B,- | T | RR |
| rrnAC1910 | -----MPQ             | RR  | DLLKT-----VGIAATGL   | LAGC | PSQGSTESNT | A,B,- | T | RR |
| rrnAC2010 | -----MNRT            | RR  | ETLGL-----VGGLAATV   | LGGC | LAPGAGDGG  | A,B,- | T | RR |
| rrnAC2149 | -----MAHDSNGLSEFVS   | RR  | KFIAT-----TGATSIAA   | IAGC | SSGSSDSGSD | -,B,C | T | RR |
| rrnAC2228 | -----MSSGDSID        | RR  | SFLTA-----AGSAAAAAT  | LAGC | SGDGGDGGGT | -,B,C | T | RR |
| rrnAC2349 | -----MTME            | RR  | TVLKR-----IGGVGAATA  | LAGC | SVQEQQNGGS | A,B,- | T | RR |
| rrnAC2589 | -----MTLPT           | RR  | GFVVG-----CAAT       | LAGC | GVLPEEREPI | A,B,- | T | RR |
| rrnAC2853 | -----MSTIPTAT        | RRR | VLEA-----LGVGTAA     | LAGC | ASAPGAKEQA | -,B,C | T | RR |
| rrnAC2868 | -----MAMDQSAS        | RR  | SFLT-----VGAAATAG    | LAGC | TGLGFGDQTL | -,B,C | T | RR |
| rrnAC3111 | -----MK              | RR  | KFLQT-----MGVGATAV   | GSGC | LGGGGEVVVS | A,B,- | T | RR |
| rrnAC3132 | -----MPTNGSSVN       | RR  | QLLKS---TGAVAGVAGLTG | LAGC | SGGDGGDGGG | -,B,C | T | RR |
| rrnB0207  | -----MGSVAMHDTV      | RR  | TVMKS-----IGAAGAVG   | LAGC | STDGGSSGNT | -,B,C | T | RR |
| rrnB0311  | -----MVQSGGGYDGV     | RR  | SVLKA---SGTALTVGTG   | LAGC | SSSSGASVRP | -,B,C | T | RR |
| OE1391R   | -----MQ              | RRR | EFLQA-----TGAALAAVG  | LAGC | SDSGGTTDGD | A,B,C | T | RR |
| OE1806R   | -----MPTEHT          | RRR | FLQA-----TGATSIAA    | LAGC | AGGDDGAGDG | A,B,C | T | RR |

|         |                                               |      |            |       |   |    |
|---------|-----------------------------------------------|------|------------|-------|---|----|
| OE2157F | -----MH RR AFLAG-----GTTLSVGV                 | LAGC | IGPSVSKSDY | A,B,C | T | RR |
| OE2171F | -----MSRDTRLDD RR TMLKS-----TGAAVTATL         | LAGC | SGGGDTGDDE | A,B,C | T | RR |
| OE2317R | -----MADFD RR EFLKL-----AGGTVGASL             | VAGC | SSGGGGGDTT | A,B,C | T | RR |
| OE3320F | -----MSAMGRAPD RR TFLRS-----AVAGGLAA          | IAGC | TDRTTTGTTN | A,B,C | T | RR |
| OE3419F | -----MAGEAT RRR CLGHV-----AAGAAL              | LAGC | TSHSDTSTST | A,B,C | T | RR |
| OE3629R | -----MG RR SFLAA-----TGAAASATT                | LAGC | LGTTGTPTI  | A,B,C | T | RR |
| OE3641F | -----MTS RRR FVAA-----VGSATAASLG              | LAGC | VGDRETTTAT | A,B,C | T | RR |
| OE3859F | -----MH RR SFIGG-----VSAAGLGI                 | LGGC | SAAVGTVAPP | A,B,C | T | RR |
| OE4008R | -----MRGQPVH RR SVLAL-----VGGGAVSA            | LAGC | TDTTDGDATT | A,B,C | T | RR |
| OE4030F | -----MH RR ALLGG-----VAAAAAAS                 | LTGC | MGAQSDDQYE | A,B,C | T | RR |
| OE4197F | -----MPH RRR VLTA-----TAAAASLS                | LAGC | LSNDGGGDSQ | A,B,C | T | RR |
| OE4225F | -----MRT RR QFLAT-----TTSLTTVGL               | LAGC | ARSPDNTDER | A,B,C | T | RR |
| OE4576F | -----MQ RR AFLKA-----GSAATLAGL                | LAGC | SSPDSDATST | A,B,C | T | RR |
| OE4593R | -----MA RRR QILAG-----GASLIAAS                | LAGC | TSSQSPTDDG | A,B,C | T | RR |
| OE5273R | -----MRTT RR SFIGA-----STTALLSG               | FAGC | TSGGDDGANS | A,B,C | T | RR |
| OE1254R | -----M RRR TYLSL-----VGSAAAAG                 | TAGC | LGVLGDDTP  | A,B,- | T | RR |
| OE1361F | -----MPS RR DVLRL-----GAGVLAAG                | TAGC | TDTAPNRVAA | A,B,- | T | RR |
| OE1597F | -----MK RR AFLAT-----AAVLT                    | TTGC | LGRTDSVSDS | A,B,- | T | RR |
| OE1679R | -----MPADDAERTTTRT RR QVLG-----MGATGAAA       | LAGC | QSTSSDPAD  | -,B,C | T | RR |
| OE1743R | -----MD RR TLLGR-----AVAG                     | LTAC | VSLSVGAGCL | A,B,- | T | RR |
| OE2175F | -----MNSDQRGVP RR EFLKA-----AVAIGGASA         | LSAC | LGRTDDPIPG | A,B,- | T | RR |
| OE2330R | -----MN RR AFLTA-----SAGLGSTAA                | LAGC | LGALGFERQS | A,B,- | T | RR |
| OE2514F | -----MMACT RR KALAA-----VGTTLS                | LSGC | ARIARPSSER | A,B,- | T | RR |
| OE3612R | -----MHSTT RR EWLGA-----IGATAATG              | LAGC | AGVGGAGQPV | A,-,C | T | RR |
| OE3910R | -----MD RR NFLKT---AGAAGTIGISG                | LSGC | LGVLGGGGED | A,B,- | T | RR |
| OE3933F | -----MSRART RRR LLSS-----VALAVVAG             | LTGC | STHRQSDTAP | A,B,- | T | RR |
| OE4093F | -----M RRR TVLVG-----VTGALFGV                 | GGGC | LTMGADETAR | A,B,- | T | RR |
| OE4305R | -----MLLSPMTMTGDGMSNTS RRR FLKA-----TGAAALTAT | VAGC | SDSTSDADGS | -,B,C | T | RR |

|          |                                            |                 |       |   |    |
|----------|--------------------------------------------|-----------------|-------|---|----|
| OE4357F  | -----M RRR DYLRA-----VGGGATGVA             | AAGC LQMGGNSAET | A,B,- | T | RR |
| OE4485R  | -----MHSDPDDGASGPVS RR AFVAA-----TGTVAGVAA | LAGC ANSTDGSGGD | -,B,C | T | RR |
| OE4551F  | -----MSDDTVS RR GFLKA-----AGAATVVATS       | TAGC TDSGGGGDGG | -,B,C | T | RR |
| OE4700F  | -----MH RR PFLSR-----LCLGAVAA              | TAGC LSRRDDRDHS | A,B,- | T | RR |
| OE5147R  | -----MDEQTHTHLS RRR TLTA-----SAGVLSAG      | LAGC ITSGDTDGD  | -,B,C | T | RR |
| OE5188F  | -----MVDSICT RRR LLAA-----VGATSVSA         | VAGC SSTLFGGDVE | -,B,C | T | RR |
| OE5404F  | -----MTRNNPHIS RR TALRT-----VAGTALAS       | MAGC MDDNGSAGPN | A,B,- | T | RR |
| HVO_0022 | -----M RRR SFLRA-----AGAGGVSAL             | LAGC TGTGGEQTTT | A,B,C | T | RR |
| HVO_0062 | -----MPDTNKLS RRR FLKA-----TGGAATAAA       | LAGC TGGDGEETTT | A,B,C | T | RR |
| HVO_0447 | -----MAS RR EFIRT---AGITGVAGLTA            | LSGC TGGDDSSEAT | A,B,C | T | RR |
| HVO_0518 | -----MN RR ALLLG-----TAGLCAS               | LAGC ASGGDAAEGS | A,B,C | T | RR |
| HVO_0530 | -----MSRDSQSNDNRLS RR QYVAG-----AGALATMG   | LAGC SGGGGSNDGG | A,B,C | T | RR |
| HVO_0553 | -----MTVRYD RR TFLRT-----AAGAVGLGS         | LSGC VGTFGTESGE | A,B,C | T | RR |
| HVO_0899 | -----MARDSKPLN RR DVLKA---TGAVGTAGLAG      | LAGC TGGGDGGGGD | A,B,C | T | RR |
| HVO_1007 | -----MNGS RR DFLAA-----TGATLLGG            | LAGC ASAPTDDGAG | A,B,C | T | RR |
| HVO_1119 | -----MTQRVS RR SFLHA-----TAASTGIAL         | LAGC SSSSGDGS   | A,B,C | T | RR |
| HVO_1228 | -----MEYS RRR LLQT-----TGLAVAAAG           | LAGC NGRSSDET   | A,B,C | T | RR |
| HVO_1401 | -----MD RR SFVKA-----AGVAGIAG              | LAGC TGGPSEGS   | A,B,C | T | RR |
| HVO_1464 | -----MEEKSTGQEGLT RR NYIRY-----GGTALGAGM   | LAGC ASDSSGSDEA | A,B,C | T | RR |
| HVO_1624 | -----MH RR TLLAA-----AGTGLAAA              | LTGC IASAGDGADD | A,B,C | T | RR |
| HVO_1705 | -----MHERDREPRGHS RRR FIAT-----TAALGVGA    | LAGC TGGSDDET   | A,B,C | T | RR |
| HVO_2038 | -----MVNKYKRLT RR DYVKY-----GAAAATAA       | LAGC GGQSASDPPT | A,B,C | T | RR |
| HVO_2141 | -----MLSTT RRR TLQW-----LGLGGVAS           | LAGC ATKSPATAQS | A,B,C | T | RR |
| HVO_2149 | -----M RRR AFLAS-----ALTAATT               | TAGC SSLGPQTEHT | A,B,C | T | RR |
| HVO_2286 | -----MK RR KLLLG-----TTGLLTA               | LAGC NTITGNKDT  | A,B,C | T | RR |
| HVO_2375 | -----MTRNSDSGLS RR KFLIA-----SGAAGLAG      | LAGC TENNTDGGGS | A,B,C | T | RR |
| HVO_2432 | -----ME RR TFLKG-----SAGAAAAFT             | LAGC LGGGEGES   | A,B,C | T | RR |
| HVO_2607 | -----MTNP DARLS RR AFLGT-----LGTGAAVG      | LAGC VGGDEGSTGD | A,B,C | T | RR |

|           |                     |     |                     |      |             |       |   |    |
|-----------|---------------------|-----|---------------------|------|-------------|-------|---|----|
| HVO_2651  | -----MAGRPS-RR-QLL  | RR  | GAVAV-----GVGLTGA   | LAGC | SSLRGCSSAE  | A,B,C | T | RR |
| HVO_2695  | -----MVDADSRKGKRVGS | RR  | SFVKA-----AGASGVAVG | LAGC | ISTGGGDGDN  | A,B,C | T | RR |
| HVO_A0181 | -----MSLT           | RR  | TVLGS-----TALLSFGL  | LAGC | VGNGGSDDGA  | A,B,C | T | RR |
| HVO_A0190 | -----MK             | RR  | TYLRT-----LGAVGVGAA | LAGC | NTPDEETPTE  | A,B,C | T | RR |
| HVO_A0192 | -----MNLS           | RR  | SYLGL-----GAAV      | LSGC | VARGGEPAGT  | A,B,C | T | RR |
| HVO_A0299 | -----MN             | RR  | NFVKF-----ASGAAAGAA | LAGC | AGNGGDGGSG  | A,B,C | T | RR |
| HVO_A0362 | -----MPSIS          | RR  | EYLAV-----SATTVLAA  | TAGC | QTSSCTPTDP  | A,B,C | T | RR |
| HVO_A0380 | -----MVKRDKGRID     | RR  | SFLKY-----SGLAGTGIT | VAGC | TGNQSEETTS  | A,B,C | T | RR |
| HVO_A0428 | -----MSNKSMPDTD     | RR  | KLLKT--IAAGATVGPATL | LSGC | TGGDAKTDVG  | A,B,C | T | RR |
| HVO_A0477 | -----MMAQDSKKLAGSVS | RR  | QFLVA-----SSAAGVAG  | LAGC | SGQSNPEADA  | A,B,C | T | RR |
| HVO_A0576 | -----MGKTLKSSTSN    | RRR | FLKA-----TGASVAALT  | LAGC | ASDDAGNGGG  | A,B,C | T | RR |
| HVO_A0611 | -----MRTKT          | RRR | FLAT-----VAGSAAVG   | LAGC | LGGDDSSDSA  | A,B,C | T | RR |
| HVO_A0620 | -----MSLPT          | RR  | QVLRA-----GGASLVAA  | LAGC | SGEGSSSSSD  | A,B,C | T | RR |
| HVO_B0093 | -----MAGKRSTNWS     | RR  | DLIKY-----GAVAGTAG  | LAGC | FDSSGQTTED  | A,B,C | T | RR |
| HVO_B0132 | -----MHT            | RR  | AVLAA-----GGATALAS  | LSGC | VGRALGALDL  | A,B,C | T | RR |
| HVO_B0139 | -----MLS            | RR  | EVLAA-----GGAALVSG  | VAGC | GGSSPAPDAT  | A,B,C | T | RR |
| HVO_B0187 | -----MVST           | RR  | SFIGG-----SAAAVAG   | LAGC | LTTSSSEGDA  | A,B,C | T | RR |
| HVO_B0198 | -----MV             | RRR | QILAG-----SAGLFASA  | LAGC | TAGGSADSES  | A,B,C | T | RR |
| HVO_B0228 | -----MVREAITSR      | RR  | KFIKS-----AGVAGTVA  | LAGC | AGNSDMSGDS  | A,B,C | T | RR |
| HVO_B0358 | -----MK             | RR  | TFLQL-----TGLGAAGG  | LAGC | LGSNSPPPRK  | A,B,C | T | RR |
| HVO_0066  | -----MPRLRS         | RRR | FLQL-----LGSASFG    | VAGC | LGRDGGSSGP  | A,B,- | T | RR |
| HVO_0154  | -----MQ             | RR  | QVLAS-----LGSLAL    | LSGC | LGGPAESPTE  | A,B,- | T | RR |
| HVO_0564  | -----MN             | RR  | TILKQ-----LAGTTAVGA | LAGC | VGVSSETDSTQ | A,B,- | T | RR |
| HVO_0628  | -----MSQDGNDVS      | RRR | FLTA-----AGAAAATAG  | LAGC | SGGGGEDTTT  | -,B,C | T | RR |
| HVO_1144  | -----MRDHGSSNGGRT   | RR  | QFLAA-----TGAAATAG  | LAGC | ATLTASGDDF  | A,-,C | T | RR |
| HVO_1240  | -----MTS            | RRR | FLAA-----SGAVAAAG   | LSGC | LAELGRLYTS  | A,B,- | T | RR |
| HVO_1241  | -----MK             | RR  | TYLRA-----AGAGAAVG  | LAGC | LGGGDANPNV  | A,B,- | T | RR |
| HVO_1244  | -----M              | RRR | ALLSL-----LAGAGVAG  | VAGC | LGDGSAPAEA  | A,B,- | T | RR |

|           |                        |     |                     |      |            |       |   |    |
|-----------|------------------------|-----|---------------------|------|------------|-------|---|----|
| HVO_1245  | -----MRNT              | RR  | AYLAA-----TAGALTLG  | TAGC | LGGGSGGSGN | A,B,- | T | RR |
| HVO_1548  | -----MH                | RR  | ALLSS-----AAALSLAG  | LSGC | LADARRTTSG | A,B,- | T | RR |
| HVO_1597  | -----ME                | RRR | LLGL-----VAVGL      | SSGC | LGSLPGATGP | A,B,- | T | RR |
| HVO_1612  | -----MASTTN            | RRR | FLAL-----GVGAA      | IAGC | LGSEPPVADD | A,B,- | T | RR |
| HVO_1888  | -----MAIE              | RRR | FLQA-----AGVGAVLG   | LSGC | TGNTSPPQAN | A,B,- | T | RR |
| HVO_1981  | -----ME                | RR  | TFLKS-----VATTGALLT | TAGC | MGGGSESQPT | A,B,- | T | RR |
| HVO_2126  | -----MD                | RR  | QFIAA-----ASAVGATA  | FAGC | TGGDAGGSGG | A,B,- | T | RR |
| HVO_2153  | -----MRNYVGAPGSTVS     | RR  | EFLAA-----TGSVGALG  | LAGC | AAPTNDGNA  | A,B,- | T | RR |
| HVO_2316  | -----MN                | RR  | EMLAL-----SGALAAAT  | IAGC | TGDGQSPAET | A,B,- | T | RR |
| HVO_2397  | -----MNTNADSSDPKLS     | RR  | SVVAA-----GSGLLTAG  | LAGC | LGSGGGAGSG | -,B,C | T | RR |
| HVO_2799  | -----MK                | RR  | ALLST-----VAGSALGL  | AAGC | LSDLDEPVET | A,B,- | T | RR |
| HVO_A0109 | -----MRA               | RR  | NVLLG-----ATATLFG   | FSGC | IAPFTSDGSL | A,B,- | T | RR |
| HVO_A0242 | -----MN                | RR  | KLLLS-----LGATSLA   | FPGC | LKGQTLNGTD | -,B,C | T | RR |
| HVO_A0324 | -----MK                | RR  | TFVTA-----STLSVAG   | LSGC | LGDTEYRIAD | A,B,- | T | RR |
| HVO_A0541 | -----MADNDDCRSGPT      | RR  | DYVKF-----GGTVLGGGL | LAGC | AGGGSDATTT | -,B,C | T | RR |
| HVO_A0549 | -----MCHDCDRTVA        | RR  | TVLSA-----VGAVGVAA  | TAGC | LGGLGTDGGG | A,B,- | T | RR |
| HVO_A0557 | -----MDQDLTDRATPT      | RR  | ACLKG-----GGALLAGGL | LAGC | AGQNDAESST | -,B,C | T | RR |
| HVO_A0558 | -----MTDSDGPT          | RR  | KFLTY-----GGSVAAGGL | LAGC | TGSSESATA  | -,B,C | T | RR |
| HVO_A0623 | -----MRSRDARDAGSDRT    | RRR | FIWL-----AGTAAMAG   | LAGC | SGGGGAEPSE | A,-,C | T | RR |
| HVO_A0627 | -----MK                | RR  | DALKT-----LGIGALAA  | TAGC | LGGFEQQSAW | A,B,- | T | RR |
| HVO_B0082 | -----MGSASESVRARFGDAAS | RR  | NFLKA-----LGTAGIAG  | LAGC | SGGGESYDQ  | -,B,C | T | RR |
| HVO_B0140 | -----MPSYS             | RR  | DALKT-----IPALAAG   | LAGC | ASLTGRDDSL | A,B,- | T | RR |
| HVO_B0144 | -----MVDDSENSKTLT      | RR  | GCLKY-----GGTIAGSGL | LAGC | SGTSEPSSSS | -,B,C | T | RR |
| HVO_B0184 | -----MNEARPL           | RRR | TVLSV-----LTAASLGG  | LAGC | LGGADDSAPD | A,B,- | T | RR |
| HVO_B0217 | -----MTDQPALTDES       | RRR | YLKA-----IGTAGLTAG  | LAGC | SGGGGGNGGG | -,B,C | T | RR |
| HVO_B0222 | -----MKRTN             | RRR | FLAA-----FSSSAFAF   | TAGC | QRPVASASER | A,B,- | T | RR |
| HVO_B0318 | -----MLDEESSIQ         | RR  | DVLSA-----LGAAGVTT  | LAGC | TGGDTGDTDD | -,B,C | T | RR |
| HVO_C0075 | -----MDSDTALD          | RRR | YLGL-----LGGSAVTG   | IAGC | TGGSNQEGTL | -,B,C | T | RR |



|         |                        |     |                      |      |             |       |   |    |
|---------|------------------------|-----|----------------------|------|-------------|-------|---|----|
| HQ1199A | -----MN                | RR  | ELLRV--LACTSISGGTFL  | TAGC | SENTASFPNV  | A,B,C | T | RR |
| HQ1310A | -----MSDESRERDID       | RR  | SFVKL-----AGTATATAA  | LAGC | GSSGGGGGAE  | A,B,C | T | RR |
| HQ1383A | -----MSS               | RRR | FLQG-----IGAVSTVGL   | VAGC | TGSTNNSNN   | A,B,C | T | RR |
| HQ1442A | -----MTSDQT            | RRR | FISV-----VGAAGITG    | LAGC | SGGGDAGDEG  | A,B,C | T | RR |
| HQ1471A | -----MSKANAGDTQVS      | RR  | KLLT-----SGAIGAAG    | LAGC | SSSEGNSSSEE | A,B,C | T | RR |
| HQ1486A | -----MFNKFDDKSDLEGPKID | RR  | TAIKL-----FAAGGVSS   | LAGC | AGESGDPGEG  | A,B,C | T | RR |
| HQ1619A | -----MVRDNDLSLH        | RR  | DVLKA-----AGASTVGIAG | LAGC | AGGGGGGDSG  | A,B,C | T | RR |
| HQ1806A | -----MSMQST            | RR  | KYIAM-----IGAVGGGA   | MTGC | LGGNTNAGGT  | A,B,C | T | RR |
| HQ1816A | -----MK                | RR  | SYLRQSVLPLIASAGIGAV  | FAGC | TRTESDDSRI  | A,B,C | T | RR |
| HQ1974A | -----MEIS              | RRR | ALES-----ASVTAAVA    | LTGC | IGESTSVSDN  | A,B,C | T | RR |
| HQ1992A | -----MSRNVNS           | RR  | SFIKA-----ASIAGIAG   | LAGC | SGQSTSNSGG  | A,B,C | T | RR |
| HQ2058A | -----MQ                | RR  | TLLST-----LSTVGAVT   | IVGC | IGGGDEDPQF  | A,B,C | T | RR |
| HQ2104A | -----MN                | RR  | ELLQL-----TGVSLGFI   | ATGC | VGIDPPQDTD  | A,B,C | T | RR |
| HQ2186A | -----MFDNSGRIN         | RR  | NYIRS---VGAASVAGLAS  | LAGC | SGDSSTDDTS  | A,B,C | T | RR |
| HQ2192A | -----MVDEKTRTS         | RR  | KFLAA-----SGSLSAAA   | LAGC | SGGGGGGGGG  | A,B,C | T | RR |
| HQ2247A | -----MNPT              | RRR | LLSG-----LGTAAAVG    | LAGC | SGGGDSGSTS  | A,B,C | T | RR |
| HQ2251A | -----MKQIDKPHN         | RR  | TLLSM-----IIIAVSVG   | LAGC | TGPGESEDSG  | A,B,C | T | RR |
| HQ2450A | -----MD                | RR  | TFVKA-----TGIAGIAG   | LAGC | SGGPSGGAGN  | A,B,C | T | RR |
| HQ2477A | -----MSSNID            | RR  | TFLT-----AGSAAAAAT   | LAGC | SGSDDGSASD  | A,B,C | T | RR |
| HQ2598A | -----MLTG              | RR  | GFIAA-----GASAVLAG   | LAGC | SGTLGGSASG  | A,B,C | T | RR |
| HQ2732A | -----MD                | RR  | SYIKS-----GAGVIAGGL  | IAGC | TGSDSESEST  | A,B,C | T | RR |
| HQ2754A | -----MYSMIQ            | RR  | KFVAG-----TGAATVAA   | LAGC | SGSSDTGDES  | A,B,C | T | RR |
| HQ2809A | -----MSERS             | RR  | DILKG---LGAAGTAGVVS  | LAGC | SRQSGGGSTE  | A,B,C | T | RR |
| HQ2849A | -----MNNWS             | RR  | EFVRI-----ATVGAGAG   | IAGC | NALSPSGSIK  | A,B,C | T | RR |
| HQ2969A | -----MARDIE            | RR  | AFLKR---AGAAGVLGTVG  | LSGC | VGGGGEGGEG  | A,B,C | T | RR |
| HQ3009A | -----MTLT              | RR  | QALLA-----TGTTLTAL   | LSGC | GATQQEFTFS  | A,B,C | T | RR |
| HQ3060A | -----MSWT              | RR  | GVLAS-----MAGVCG     | VSGC | LASPDRSLPT  | A,B,C | T | RR |
| HQ3135A | -----MPT               | RR  | TVIAA-----LTTVGTAT   | LSGC | GSFDNTADNN  | A,B,C | T | RR |

|           |                     |     |                     |             |            |             |       |    |    |
|-----------|---------------------|-----|---------------------|-------------|------------|-------------|-------|----|----|
| HQ3182A   | -----MTENTN         | RR  | TFLKI---            | AGSTGAVGLAG | LAGC       | AGGGGGGDGT  | A,B,C | T  | RR |
| HQ3283A   | -----MSDGET         | RR  | EFLEA-----          | FGVASISI    | LGGC       | QTSGSDTQT   | A,B,C | T  | RR |
| HQ3383A   | -----MIDKS          | RR  | GFLAG-----          | VGAAATTS    | LAGC       | AGIGSGSQT   | A,B,C | T  | RR |
| HQ3619A   | -----MSDNRMS        | RR  | AVLAT-----          | GAVGLGAS    | LAGC       | SSSGSGGGD   | A,B,C | T  | RR |
| HQ4034A   | -----MDMSMN         | RR  | GVIEA-----          | IGVGGLTV    | LAGC       | SSNSPNEQSE  | A,B,C | T  | RR |
| HQ4036A   | -----MD             | RRR | YIGI-----           | VGTIVAGA    | LAGC       | NSNTENNAPS  | A,B,C | T  | RR |
| HQ1481A   | -----MVDDSEVN       | RRR | FLRA-----           | TGAVAATVG   | VAGC       | SQGS DGETET | -,B,C | T  | RR |
| HQ1855A   | -----MTDSKIG        | RRR | LLGL-----           | TGA AVLGG   | LAGC       | NTQTQS QSNT | A,B,- | T  | RR |
| HQ1912A   | -----MLDDSLT        | RR  | ALLAS-----          | GVAVTLG     | LTGC       | AETDPSSTPV  | -,B,C | T  | RR |
| HQ2373A   | -----MD             | RR  | NYLHA-----          | IAGAGAF     | TAGC       | LGSTLSFRDG  | A,B,- | T  | RR |
| HQ3303A   | -----MSSEGADKKQRIAN | RR  | TYLKG-----          | LGAAGTVL    | LAGC       | SGSGGGSGGD  | -,B,C | T  | RR |
| Nmag_0005 | -----MKRVAPSVT      | RR  | SLLAG-----          | ASGVGLSA    | LAGC       | SERFWSRAEN  | A,B,C | T  | RR |
| Nmag_0106 | -----MVH            | RR  | NILKG-----          | AAGVGLAS    | LAGC       | LGGDNGGVDT  | A,B,C | T  | RR |
| Nmag_0499 | -----MAGRDLDSA      | RRR | FLGA-----           | AGAAATAG    | IAGC       | VSLPTALDDR  | A,B,C | T  | RR |
| Nmag_0622 | -----MQTDPT         | RR  | TFLAG-----          | SATAGIVA    | VAGC       | ASDGDGNGGE  | A,B,C | T  | RR |
| Nmag_0655 | -----MN             | RR  | TALRS-----          | AGVLATVG    | LAGC       | VDAVEEHFQG  | A,B,C | T  | RR |
| Nmag_0697 | -----MNGLCD         | RR  | AFLAS-----          | AATGGMLG    | LAGC       | LSGDAEQVST  | A,B,C | T  | RR |
| Nmag_0704 | -----MDDRLT         | RRR | LIAI-----           | SGAVSAAA    | LAGC       | NDDPEDPDDP  | A,B,C | T  | RR |
| Nmag_0795 | -----MEGNSRYK       | RRR | VIGL-----           | IGTGT VVS   | VAGC       | LTDDTEDDGV  | A,B,C | T  | RR |
| Nmag_0945 | -----MDPSTD         | RRR | FVQA-----           | MGGGFAVA    | LAGC       | LSDDEENGGE  | A,B,C | T  | RR |
| Nmag_1151 | -----MPLQ           | RR  | QLLAG-----          | IGGAATLT    | VAGC       | LGDDDRGTTL  | A,B,C | T  | RR |
| Nmag_1294 | -----MN             | RR  | KLLLG-----          | SGTFVASM    | AAGC       | LQAGGTSENK  | A,B,C | T  | RR |
| Nmag_1357 | -----MHRPSFPS-RR-S  | RR  | AFLSG-----          | TAVAGTAA    | LAGC       | TTLYHVL PDR | A,B,C | T  | RR |
| Nmag_1387 | -----MTFRPK         | RR  | ELLMG-----          | AGAVSLGG    | LAGC       | LSDVPGLESE  | A,B,C | T  | RR |
| Nmag_1419 | -----ME             | RR  | KILLG-----          | SGAALATA    | LAGC       | SSSETDEPSG  | A,B,C | T  | RR |
| Nmag_1438 | -----MGDDSKS        | RR  | TVLKG--VGIASAAGLTTS | LAGC        | VSQNGGSDVE | A,B,C       | T     | RR |    |
| Nmag_1742 | -----MSDLP          | RRR | LLAL-----           | GGTALTGA    | IAGC       | SSSANEDDPN  | A,B,C | T  | RR |
| Nmag_1771 | -----MQ             | RR  | TYLTL-----          | TGSVGLLA    | VAGC       | LSEEQSTPKE  | A,B,C | T  | RR |

|           |                    |     |                      |      |             |       |   |    |
|-----------|--------------------|-----|----------------------|------|-------------|-------|---|----|
| Nmag_1801 | -----MN            | RR  | QHIAQ-----LGGVGLVA   | LSGC | LDTISSDETD  | A,B,C | T | RR |
| Nmag_1824 | -----MD            | RR  | SLIHT-----AVGASFI    | LSGC | LSRSDGNSET  | A,B,C | T | RR |
| Nmag_1899 | -----MK            | RR  | TYLTT-----TSATAVGLA  | LAGC | MGGEESDEDP  | A,B,C | T | RR |
| Nmag_1923 | -----MSRVG         | RR  | TYLAA-----AGGAVAGLAG | LAGC | LGDGGDSTPI  | A,B,C | T | RR |
| Nmag_1931 | -----MQ            | RR  | TVLAG-----LGSLGSLLA  | LSGC | LSDDHGEIDE  | A,B,C | T | RR |
| Nmag_2002 | -----MELT          | RR  | KALTT-----SFSGLVMGT  | IAGC | TDDTPEDEEE  | A,B,C | T | RR |
| Nmag_2005 | -----MDVT          | RR  | SVLKR-----TLGGAALGA  | LAGC | LNEPDETS GT | A,B,C | T | RR |
| Nmag_2069 | -----MPS           | RR  | SVLGA-----GATAGFAT   | VAGC | LGSNHSFGAL  | A,B,C | T | RR |
| Nmag_2138 | -----ME            | RRR | VLAT-----AGLLPIS     | VAGC | VTVSTESADE  | A,B,C | T | RR |
| Nmag_2173 | -----MARHTT        | RR  | SVLKG---STAAAVGTTL   | LAGC | VTDEGNGTGD  | A,B,C | T | RR |
| Nmag_2271 | -----MIP           | RR  | KFLQC-----GVVSFSGSI  | IAGC | SESTETSNPE  | A,B,C | T | RR |
| Nmag_2366 | -----MTKRQSRSGGWSS | RR  | TFVLA-----TGAIGTSV   | LAGC | LDGDDSDSQA  | A,B,C | T | RR |
| Nmag_2372 | -----MAKFTRPVS     | RR  | GVLTS-----GATAVGVA   | VAGC | ISDDTDGAGQ  | A,B,C | T | RR |
| Nmag_2397 | -----MVWNIG        | RR  | TLLSV-----TGLAL      | LSGC | LDSGNTGETN  | A,B,C | T | RR |
| Nmag_2411 | -----MNQT          | RR  | AFLGT-----TGTVGLGV   | VAGC | LGSEDPPEPP  | A,B,C | T | RR |
| Nmag_2669 | -----MASDRDQT      | RR  | QLLGL-----AGATVSTML  | IAGC | GDTEPEDENG  | A,B,C | T | RR |
| Nmag_2689 | -----M             | RRR | PFLVA-----ASATTVG    | LAGC | TSAQERLGDV  | A,B,C | T | RR |
| Nmag_2702 | -----MNDSRLD       | RR  | QFLAA-----AGAGLAGV   | VAGC | SEPNNASSIE  | A,B,C | T | RR |
| Nmag_3059 | -----ME            | RR  | TYLGS---LGAAGAAGLTG  | LAGC | LDELSGDDDQ  | A,B,C | T | RR |
| Nmag_3090 | -----MVWELN        | RRR | VLSG-----VGAAGIAG    | LAGC | IGDEEEVTEG  | A,B,C | T | RR |
| Nmag_3154 | -----MEYN          | RR  | TILQS-----LLPAVGL    | LAGC | SFRDDVHLFE  | A,B,C | T | RR |
| Nmag_3278 | -----MADNRMT       | RRR | LLAG-----SSVAAAAG    | LAGC | TDRLDDLGRD  | A,B,C | T | RR |
| Nmag_3316 | -----MPS           | RR  | EALLT-----AGPLLSST   | LAGC | LDTFRTSGSL  | A,B,C | T | RR |
| Nmag_3531 | -----M             | RRR | KYLTG-----ISSIATAG   | IAGC | AGHTPTDDQ   | A,B,C | T | RR |
| Nmag_3965 | -----MAIQ          | RR  | GFIAA-----VGTGGAVG   | LAGC | TGLGDDTGDS  | A,B,C | T | RR |
| Nmag_4115 | -----MN            | RR  | TVLTT-----AGLVA      | VAGC | LSESSDPVTE  | A,B,C | T | RR |
| Nmag_4271 | -----MN            | RR  | SLLAM-----AVPASFAA   | LSGC | LGSNSALDDW  | A,B,C | T | RR |
| Nmag_0096 | -----MVN           | RR  | DIKKG-----AGAASIAG   | LAGC | LGGDNGGRDI  | A,B,- | T | RR |

|           |                        |      |                     |      |            |       |   |    |
|-----------|------------------------|------|---------------------|------|------------|-------|---|----|
| Nmag_0184 | -----MQGANYSLD         | RR   | TLLQR--TGAATSIAGLAA | IAGC | IDDSNGDDDD | -,B,C | T | RR |
| Nmag_0242 | -----MN                | RR   | GYLGA-----IGAVGLTA  | TAGC | VEELQAAADG | A,B,- | T | RR |
| Nmag_0327 | -----MTDFPT            | RRR  | VLQL-----TGVGATAS   | LAGC | TQFDIPGIGS | A,B,- | T | RR |
| Nmag_0438 | -----MN                | RR   | TYLGA-----VAGGLTAT  | SAGC | LGDFGDSID  | A,B,- | T | RR |
| Nmag_0446 | -----MAENNPTT          | RR   | TILKV----SGAVGAGAF  | LAGC | ADNGNGNDP  | -,B,C | T | RR |
| Nmag_0460 | -----M                 | RRR  | TFVGT-----LGGGAIAG  | FAGC | LSREDTDDN  | A,B,- | T | RR |
| Nmag_0557 | -----MSPS              | RRR  | FLLGA-----TGLTGA    | TAGC | LSYVRRVSPG | A,B,- | T | RR |
| Nmag_0563 | -----ME                | RR   | ALLTS-----LCFPLFVS  | VSGC | LAREQSPRLS | A,B,- | T | RR |
| Nmag_0609 | -----MKYD              | RR   | TYLSS-----AIITIT    | LSGC | TGLINSGRIR | A,B,- | T | RR |
| Nmag_0793 | -----MN                | RRR  | ALTV-----GVTTGLTA   | VAGC | LTGMLDDESS | A,B,- | T | RR |
| Nmag_0856 | -----MN                | RR   | QYLAS-----ATGVAIVG  | LSGC | LQILASGEIS | A,B,- | T | RR |
| Nmag_0963 | -----MVDDTTMSNQYALT    | RR   | SALAS-----ASGLLVG   | VAGC | LSGDDNEVDS | -,B,C | T | RR |
| Nmag_1091 | -----MPST              | RR   | SLLAS-----ALVGSAA   | LAGC | LSRVRSPPS  | A,B,- | T | RR |
| Nmag_1209 | -----MPS               | RR   | AVLAT-----CGSAV     | LAGC | SAVRREPSVT | A,B,- | T | RR |
| Nmag_1789 | -----MPAKNTHG          | RR   | TFLRS--TAAAGSVAALGG | LAGC | TGMLDGGDDT | A,B,- | T | RR |
| Nmag_1814 | -----MCPPRS            | RR   | PVLAS-----VASLSAL   | TAGC | STNWFSPET  | A,B,- | T | RR |
| Nmag_1940 | -----MD                | RR   | TFVHG-----VGGGSVTA  | LAGC | LTRNGENEEH | A,B,- | T | RR |
| Nmag_1961 | -----MK                | RR   | TLLRA---TGGAVLGGSVG | LAGC | LDQFSDSED  | A,B,- | T | RR |
| Nmag_2110 | -----MSQGHTD           | RR   | TMLAL-----SGAFLAG   | MAGC | TGTAPDSEDE | -,B,C | T | RR |
| Nmag_2327 | -----MDLN              | RR   | TMLGG-----IGTASLTG  | LAGC | LNLVGLATHE | A,B,- | T | RR |
| Nmag_2358 | -----MAPSQNLGRGLS      | RR   | SAIAT-----IGSIGALS  | LAGC | LGGDEDGLSG | -,B,C | T | RR |
| Nmag_2390 | -----M                 | RRRR | LLST-----GVVVA      | LAGC | VSLPADEDET | A,B,- | T | RR |
| Nmag_2456 | -----MH                | RR   | SVLAA-----ASAVASVG  | IAGC | LEFFEDNGED | A,B,- | T | RR |
| Nmag_2492 | -----MVENNRYRPGIN      | RRR  | VLQG-----LTAAGVIG   | AAGC | LDSEETDETG | A,B,- | T | RR |
| Nmag_2581 | -----MPS               | RRR  | TLAL-----GATLSTTA   | LAGC | TALRSEPEYL | A,B,- | T | RR |
| Nmag_2647 | -----MD                | RR   | TYLST-----SAATI     | FAGC | TELSGADEPD | A,B,- | T | RR |
| Nmag_2680 | -----MN-RR-NRSANAERGTT | RR   | TILAG-----ATTAAIGL  | AAGC | LSEDEESVPD | A,-,C | T | RR |
| Nmag_2733 | -----MD                | RR   | QFLAA-----STVGVAAT  | TAGC | LGNALSSTDD | A,B,- | T | RR |

|           |                    |     |       |                |      |             |       |   |    |
|-----------|--------------------|-----|-------|----------------|------|-------------|-------|---|----|
| Nmag_2739 | -----MPSD          | RR  | TFLT  | -----CGTGATTA  | LAGC | ADARVSARDV  | A,B,- | T | RR |
| Nmag_2761 | -----MLS           | RR  | TTLQA | -----TIPLFASL  | LSGC | VSSMLPRDPP  | A,B,- | T | RR |
| Nmag_2904 | -----MAHQPSGQSKLTS | RR  | AVLSA | -----AGAGVTAA  | LAGC | SDSQDEDPVR  | -,B,C | T | RR |
| Nmag_2996 | -----MTHPS         | RR  | TLLGS | -----TAGLLAL   | TAGC | IADNDDDDDD  | A,B,- | T | RR |
| Nmag_3163 | -----MD            | RR  | TWLTA | -----TTVGTLA   | FSGC | LSELADRNS   | A,B,- | T | RR |
| Nmag_3234 | -----MH            | RRR | VLAH  | -----VGTGTIVG  | TVGC | LSVPLPTGDS  | A,B,- | T | RR |
| Nmag_3274 | -----MTDSN         | RR  | SFVAA | -----TAAVGTLG  | VAGC | LSTIDGWGDG  | A,B,- | T | RR |
| Nmag_3481 | -----MATDPRDTT     | RR  | SLLAT | -----TGSLGVLG  | LAGC | LSDDEEDDGG  | A,-,C | T | RR |
| Nmag_3486 | -----MRTSFP        | RRR | LLAT  | -----TGTISALAI | GAGC | LDDSDSESDP  | A,B,- | T | RR |
| Nmag_3525 | -----MTDRHT        | RR  | TVLQA | -----AGATSVVAL | AAGC | LSDDEEENG   | A,-,C | T | RR |
| Nmag_3601 | -----MD            | RR  | EFVAA | -----GAVCGLGL  | MAGC | LDDALADVTS  | A,B,- | T | RR |
| Nmag_3725 | -----MLDSDHVS      | RR  | TALRL | -----SLASGVAI  | LAGC | ADDNDENDVD  | -,B,C | T | RR |
| Nmag_3851 | -----MPIGKQS       | RRR | FLTA  | -----TGGAAALGT | VAGC | LGGDDDDVVN  | A,-,C | T | RR |
| Nmag_3944 | -----MMSFKDGV      | RR  | DALKV | -----AGGVGLVG  | LAGC | LGDGEQTDIT  | A,B,- | T | RR |
| Nmag_4024 | -----MASRQID       | RR  | SFLQV | -----AGGAGIAG  | LAGC | LSGDVEAVSI  | A,B,- | T | RR |
| Nmag_4050 | -----MEPDGNMQFN    | RR  | ELISA | -----LSAGGVLA  | LAGC | ADQADGDGND  | -,B,C | T | RR |
| Nmag_4142 | -----M             | RRR | EFIAV | -----GCCSVCGI  | SAGC | LDEDDSEVP   | A,B,- | T | RR |
| NP0126A   | -----M-RR-PHS      | RR  | QFLVA | -----AGLTVTAA  | AAGC | FDSASEPTGE  | A,B,C | T | RR |
| NP0278A   | -----M             | RRR | ALLTS | -----CVTVAAVS  | ISGC | FDDGESPSGG  | A,B,C | T | RR |
| NP0322A   | -----MDLS          | RR  | GVLA  | -----GAVA      | LAGC | ADLEEQADRR  | A,B,C | T | RR |
| NP0660A   | -----MPELT         | RRR | LLAA  | -----AAGGIAG   | LAGC | AAGSRESPPP  | A,B,C | T | RR |
| NP0894A   | -----M             | RRR | TFLST | -----VAAGTIAA  | SAGC | SSEELGLGLD  | A,B,C | T | RR |
| NP0938A   | -----MDST          | RRR | MLGA  | -----IAGSLSVV  | AAGC | LGGDDAGDAP  | A,B,C | T | RR |
| NP1600A   | -----MHTTPT        | RR  | TVVRT | -----AAAAAGLA  | VAGC | LDSEPDEAPE  | A,B,C | T | RR |
| NP1648A   | -----MERTV         | RRR | TVLTV | -----LASSGSVL  | VAGC | SDDDGTTETPE | A,B,C | T | RR |
| NP1652A   | -----MTRKLS        | RR  | QLVSG | -----LAAAGAGV  | AAGC | TDGEEGDS    | A,B,C | T | RR |
| NP1748A   | -----M             | RRR | TYLTA | -----AGGLFAAG  | LAGC | TDEEPTGN    | A,B,C | T | RR |
| NP1978A   | -----MS            | RR  | SLLAA | -----AGAGLAA   | LSGC | TVLGDPPGED  | A,B,C | T | RR |

|         |                                                         |       |   |    |
|---------|---------------------------------------------------------|-------|---|----|
| NP2004A | -----MRNPTVS RR KLLAS-----GAAAAGIG LAGC MGGNGGSDGP      | A,B,C | T | RR |
| NP2092A | -----MH RR TFVSG-----VAAGAVAG LAGC LGGDDDAPTT           | A,B,C | T | RR |
| NP2184A | -----MVS RR GVLAA-----LAVGASSS LAGC HTGALVEVQD          | A,B,C | T | RR |
| NP2186A | -----MD-RR-VT RR GVLAA-----AGIA LAGC TDNGDDQPVR         | A,B,C | T | RR |
| NP2288A | -----MQQLSDS RRRR TVLAA-----IGAGAAG LAGC LDGGSSNDPE     | A,B,C | T | RR |
| NP2536A | -----MSPDLT RR GYLAV-----TAAAGGAA LAGC SDDVTADPDA       | A,B,C | T | RR |
| NP2818A | -----MNRDELVANKTVG RR ALLGS-----VAAFAGV VAGC SQLSPASSKE | A,B,C | T | RR |
| NP2860A | -----MQPS RR TFVKS-----GIGVVGLGA LAGC AEEDPDPGAE        | A,B,C | T | RR |
| NP3028A | -----MTRYT RRR LLGS-----SALAALGA FAGC TAEQPDDPEE        | A,B,C | T | RR |
| NP3032A | -----MKRTT RRR FIAS-----GAAVGAIT IAGC ADEDPEPEPE        | A,B,C | T | RR |
| NP3040A | -----MQ RR EFLAG-----GAGLTTAF TAGC ADSDRANVGI           | A,B,C | T | RR |
| NP3142A | -----MSKQTQDTWT RRR MLAV-----AGAGAVVG LAGC ADESSEEPPEE  | A,B,C | T | RR |
| NP3232A | -----MD RR AFLAT-----TGAAAAAS VAGC LGRGLSDEDF           | A,B,C | T | RR |
| NP3388A | -----M RRR TYIAL-----SGAALAS LAGC SDDEGENGDG            | A,B,C | T | RR |
| NP3578A | -----MKLT RR QALTA-----FGSAGVVG MAGC LGGGNDDEL          | A,B,C | T | RR |
| NP3954A | -----MKDIS RRR FVLGT-----GATVAAAT LAGC NGNGNGNGNG       | A,B,C | T | RR |
| NP4140A | -----MTRHIN RR NVLKA-----AGAASMVA LAGC NGNGNGNGNG       | A,B,C | T | RR |
| NP4216A | -----MPS RR ELLRL--GGATLAAAASAAG IAGC SEEAFFEGPAD       | A,B,C | T | RR |
| NP4616A | -----MNPS RR TVLKS-----GVGVAAAAA LAGC NGNGNGNGEE        | A,B,C | T | RR |
| NP4692A | -----MAPP RRR QILSI-----GGLGLAAA IAGC GDTAPDDDTF        | A,B,C | T | RR |
| NP4700A | -----MASDTT RR QFLIA-----ASAAATFTV VAGC SEPEEDPPGY      | A,B,C | T | RR |
| NP4736A | -----MIS RR EFVAS-----VTATGAVV VAGC GTDEDAAPPEE         | A,B,C | T | RR |
| NP4744A | -----MGTHT RRR FVRG-----TAAVAATGA LAGC NGNGNGNENG       | A,B,C | T | RR |
| NP4750A | -----MRWT RRR VVAA-----IGAATTAA VAGC SDTDEDAENG         | A,B,C | T | RR |
| NP5018A | -----MKLH RR TALRL-----AGVGVGTA VAGC LDPETDNGET         | A,B,C | T | RR |
| NP5270A | -----M RRR TLLVS-----AAALPA VAGC SNVLPTGTND             | A,B,C | T | RR |
| NP6072A | -----MN RR AALTV-----VTTATASA LAGC GGVDIGTSGA           | A,B,C | T | RR |
| NP6086A | -----M RRR ALLAA-----TGTACGV LAGC LDIDSRFSGS            | A,B,C | T | RR |

|         |                                                             |       |   |    |
|---------|-------------------------------------------------------------|-------|---|----|
| NP6254A | -----ME RR AFLMA-----TGGAAT IAGC TTGGNTEEN                  | A,B,C | T | RR |
| NP6272A | -----MN RR AIIVA-----GGVFF LSGC GERATDMSNE                  | A,B,C | T | RR |
| NP0250A | -----MELS RR SFLAT-----SAVATAG FAGC TGDSDPDPP               | A,B,- | T | RR |
| NP0254A | -----MPRFD RR DYLR-----AGLAGAAA LAGC TDVFDDNGET             | A,B,- | T | RR |
| NP0528A | -----M RRR TVLAL-----AGAAGTAG LAGC LDDVLGSENG               | A,B,- | T | RR |
| NP0544A | -----MVDTSNLD RR SLLKG-----VGVAGIAG LAGC TGNGDGNGNG         | -,B,C | T | RR |
| NP0758A | -----MSDEGVD RR TFLQY--GGTAAAAAASVS VAGC NGNGDGNGNG         | -,B,C | T | RR |
| NP0950A | -----MPT RRR VLAV-----AAAATA TAGC TALGDGENDE                | A,B,- | T | RR |
| NP1070A | -----MRS RR TVLGA-----AAVLASG FAGC FSTEAPDDQE               | A,B,- | T | RR |
| NP1480A | -----M RRR QVLAA-----VPVA LAGC VAAPEPGPPT                   | A,B,- | T | RR |
| NP1598A | -----MTQNTNPN RR TFLKA-----AGAGGAFL LAGC VGNEGEPTDE         | -,B,C | T | RR |
| NP1654A | -----MN RR QFLAA-----GALVA AAGC LGPDDAEPPA                  | A,B,- | T | RR |
| NP1680A | -----MAT RRR FMCM-----GSTTVGLVA LSGC LGAEGAEVD              | A,B,- | T | RR |
| NP1858A | -----MVS RR QLLAA-----GGLASAG LAGC LDSLSDGSSP               | A,B,- | T | RR |
| NP2396A | -----METQVS RRR LLQA-----GGVGAAAS FAGC GYMDTEDGGA           | A,B,- | T | RR |
| NP2622A | -----MDPQSSSQSVRMS RR SVLGA-----VGAGATAA LAGC SGGQDGDPLR    | -,B,C | T | RR |
| NP2694A | -----M RRR ELIAA-----APLVA TAGC TIGGEPPDGS                  | A,B,- | T | RR |
| NP2862A | -----MNLS RR GLLTA-----GAGAATAA VAGC VDAAAPGQES             | A,-,C | T | RR |
| NP2890A | -----MK RR DVLAG-----VGATALLG TAGC LGVAGLDEHE               | A,B,- | T | RR |
| NP3030A | -----MKFRERDGLS RR EYVRA-----MVAAGGAAG LAAC LEAFDDGDTG      | A,B,- | T | RR |
| NP3732A | -----MPPE RR DVLRL-----GTVGLGGL VAGC LDNGGADFGS             | A,B,- | T | RR |
| NP3968A | -----MELS RR DALRA-----GGGLLAAAA LSGC VEERVTRRET            | A,B,- | T | RR |
| NP4332A | -----MMPSIS RRR LLVG-----GAAALGSA LAGC PSPTPGGALE           | A,B,- | T | RR |
| NP4786A | -----MN RR SFVAG-----AFGGAGIV TAGC IDIDSEDWEM               | A,B,- | T | RR |
| NP5000A | -----MSQQRQTDGNDGRFTG RR AFIVG-----AAATGVAA FAGC TDNGNGDGNG | A,-,C | T | RR |
| NP5286A | -----MSSRLVS RRR AVAV-----AATVA VAGC LTEAGRRCRG             | A,B,- | T | RR |
| NP6022A | -----MSLPPTAS RRR MLAA-----AGTALATFS LAGC SDESDDDPE         | -,B,C | T | RR |
| NP6104A | -----MAHTPSDRVS RR SVLAT-----TGAAAAFG LAGC LGGGGGDGLS       | -,B,C | T | RR |

|           |               |     |                    |           |            |             |       |    |    |
|-----------|---------------|-----|--------------------|-----------|------------|-------------|-------|----|----|
| rrnAC0160 | -----MMTERGIS | RR  | EFKS-----          | AVAIGGTAA | LAAC       | LDRGSGTVPK  | A,B,C | -  | RR |
| rrnAC0236 | -----MLLE     | RR  | HLSLA-----         | LVVLLIA   | SAGC       | SGLFGSETGT  | A,B,C | -  | RR |
| rrnAC0863 | -----MK       | RR  | HLLLV-----         | AVLALVA   | LSGC       | TGFFGSEED   | A,B,C | -  | RR |
| rrnAC2237 | -----M        | RR  | PFALV-----         | ILCAVALL  | LAGC       | QAPSVSPDTE  | A,B,C | -  | RR |
| pNG7056   | -----MRCS     | RR  | HALRL-----         | IGASGVITA | TAGC       | LNPGSLDNYA  | A,B,- | -  | RR |
| rrnAC0311 | -----MY       | RRR | VLAL-----          | CGLAII    | GAGC       | QGETADTETV  | A,B,- | -  | RR |
| rrnAC1046 | -----M        | RR  | LVLAV-----         | CLVSF     | LAGC       | GAFMTDSPPL  | A,B,- | -  | RR |
| rrnAC1739 | -----MGDLS    | RR  | GFGAS-----         | VLAAL     | SAGC       | LGSRPDQESE  | A,B,- | -  | RR |
| rrnAC2271 | -----M        | RRR | HFVQT-----         | LGVSAVVG  | SAGC       | AEQSDDTTSA  | A,B,- | -  | RR |
| rrnAC2940 | -----M        | RR  | GVAIA-----         | VVCLCLL   | SAGC       | TGLFGDNAAA  | A,B,- | -  | RR |
| OE3190F   | -----M        | RR  | QLAAL-----         | LVVALVA   | VAGC       | AGGSAPATDD  | A,B,C | -  | RR |
| OE4563F   | -----MA       | RR  | LLAVA-----         | VVCLVV    | LAGC       | QGGMSGDATT  | A,B,C | -  | RR |
| OE6028R   | -----MSL      | RR  | LLAVF-----         | AVVGMVV   | IAGC       | AGGIDNGEPA  | A,B,C | -  | RR |
| OE5030R   | -----MP       | RR  | VLLRS-----         | IGVCSAVG  | IAGC       | LSQGEARSIT  | A,B,- | -  | RR |
| HVO_1806  | -----MN       | RR  | LAAVF-----         | SAFLLV    | VAGC       | AAPVADPSAA  | A,B,C | -  | RR |
| HVO_1926  | -----MQ       | RR  | TIAPI-----         | FLVGLVL   | LAGC       | LSAPLQTTAD  | A,B,C | -  | RR |
| HVO_2145  | -----MTRDTNHT | RRR | FTAL-----          | TATAALSTA | LAGC       | SGSGGDAANA  | A,B,C | -  | RR |
| HVO_1176  | -----MN       | RR  | LLVGI-----         | AALALLLV  | TAGC       | LGGTSSVSND  | A,B,- | -  | RR |
| HVO_1477  | -----MV       | RR  | ATATL-----         | VVVVLAV   | LAGC       | LGGGGAGAAT  | A,B,- | -  | RR |
| HVO_1673  | -----MSS      | RR  | VVAVL-----         | ALAALVL   | TSGC       | IGFLTGEETL  | A,B,- | -  | RR |
| HVO_1802  | -----MTV      | RRR | SLGM--RGSTLLVAVLVV | LAGC      | AAPVSPGTDG | A,B,-       | -     | RR |    |
| HQ1059A   | -----MS       | RR  | ISRAS-----         | IALSLLIV  | LAGC       | SGGGSFLNPN  | A,B,C | -  | RR |
| HQ2489A   | -----MN       | RR  | LLAV-----          | CALAFLGV  | LSGC       | LGIGTGPIPA  | A,B,C | -  | RR |
| HQ3375A   | -----MNVSQ    | RR  | IVMLG-----         | IALLVV    | FSGC       | AEVNDISIAPT | A,B,C | -  | RR |
| HQ1196A   | -----MI       | RR  | QILTK-----         | CAVALSVG  | LVGC       | SGGGGGGSTD  | A,B,- | -  | RR |
| HQ2519A   | -----MI       | RRR | FISA-----          | IVAGIII   | IGGC       | TGPNDSPNTA  | A,B,- | -  | RR |
| Nmag_0702 | -----MNAKEIMN | RR  | HVLSS-----         | IGTTTGTL  | LAGC       | LTDDSGEPMA  | A,B,C | -  | RR |
| Nmag_1399 | -----MY       | RR  | LLLSS-----         | ISLVA     | VSGC       | TSNSDKEDGT  | A,B,C | -  | RR |



|           |                     |     |            |           |      |            |       |   |    |
|-----------|---------------------|-----|------------|-----------|------|------------|-------|---|----|
| Nmag_2088 | -----MY             | RRR | LLAA-----  | AGLTTAV   | VAGC | LTSDGTDGDG | A,B,C | - | RR |
| Nmag_2424 | -----MN             | RR  | VYLAA----- | VGTSLSAS  | LAGC | SSVMSVFDDE | A,B,C | - | RR |
| Nmag_2835 | -----MYVT           | RR  | LVCVA----- | ILL       | TAGC | VGSDDEGLDD | A,B,C | - | RR |
| Nmag_3079 | -----MK             | RR  | HILTT----- | IGASLSFA  | TAGC | LQGGSSNNEG | A,B,C | - | RR |
| Nmag_0572 | -----MK             | RR  | LVLAT----- | AGATL     | VSGC | SSYLRAPSNS | A,B,- | - | RR |
| Nmag_1805 | -----MVS            | RR  | HLLSS----- | LGCAA     | LAGC | TAVLPYDGTQ | A,B,- | - | RR |
| Nmag_2536 | -----MSVP           | RR  | MMGAA----- | LLGV      | VAGC | LSIGPGAENN | A,B,- | - | RR |
| Nmag_2731 | -----MID            | RR  | TSLVA----- | VLGSILA   | ISGC | LERISNGDTE | A,B,- | - | RR |
| Nmag_3155 | -----MN             | RR  | LVFGS----- | LAVVLLIG  | LAGC | TMFFTGISDD | A,B,- | - | RR |
| Nmag_3710 | -----MN             | RR  | VCLRS----- | IAASSVVT  | TAGC | LESLSQENDE | A,B,- | - | RR |
| Nmag_3769 | -----MH             | RR  | VYLST----- | LSAAGIGS  | LSGC | LDILATDSES | A,B,- | - | RR |
| NP3728A   | -----M              | RRR | VLLSL----- | VSGTAAA   | LAGC | ADGMEEANDD | A,B,C | - | RR |
| NP4392A   | -----MK             | RR  | YYLGT----- | IAAAA     | LAGC | SELQPEEAPE | A,B,C | - | RR |
| NP6066A   | -----MPS            | RR  | YILAC----- | VGAASIA   | GAGC | TDLSDSNGRP | A,B,C | - | RR |
| NP1172A   | -----MD             | RR  | LLAAT----- | ALAAVLL   | SAGC | TVGYQPAADA | A,B,- | - | RR |
| NP4102A   | -----MN             | RR  | LLAAV----- | AVFVLFG   | LAGC | TTIFGADVDD | A,B,- | - | RR |
| NP4728A   | -----MSSHPRQNESKGVS | RR  | TFALL----- | AGSAVTAG  | LAGC | TDDPMENGDA | A,B,- | - | RR |
| NP6234A   | -----MQ             | RR  | KFSTT----- | TGSALSIL  | FAGC | LGGTDVDPNE | A,B,- | - | RR |
| rrnAC0370 | -----MDSGRNGGGPSVF  | RR  | DLLRS----- | IGAAGLAG  | LAGC | GGSEGVTDGD | A,B,C | - | RR |
| OE3575R   | -----MRNDDCCS       | RR  | QFGTT----- | LGGIGVATM | IAGC | SAFGLPSKKP | A,B,- | - | RR |
| HVO_B0280 | -----MRETLT         | RR  | QFGVG----- | VAVATVA   | LAGC | TDTGGGDGPV | A,B,C | - | RR |
| NP4850A   | -----MDE-RR-CT      | RR  | QVGAG----- | VIGGLSVL  | VAGC | LGNGDGNSSH | A,B,C | - | RR |
| rrnAC1401 | -----M              | HR  | IVPAI----- | GLAALVV   | LSGC | VTATVDSTVA | A,B,C | - | -  |
| rrnAC2054 | -----MT             | TR  | LLTVL----- | VVSLLV    | LAGC | LGGGPAVGDG | A,B,C | - | -  |
| rrnAC2239 | -----M              | RK  | ELLIA----- | LTVV      | LAGC | TVPSFGGSDH | A,B,C | - | -  |
| rrnAC2345 | -----MTA            | VR  | PLVLV----- | AIAVLVS   | LAGC | GALFGSGGEA | A,B,C | - | -  |
| rrnB0030  | -----MYRFARNLCS     | LR  | GLARV----- | VVVVMLVT  | ASGC | SAIGSLSEN  | A,B,C | - | -  |
| rrnAC0024 | -----M              | RW  | LSTAA----- | VVVVLL    | TAGC | NAFVGADTAA | A,B,- | - | -  |

|           |                        |    |                     |             |            |            |       |   |   |
|-----------|------------------------|----|---------------------|-------------|------------|------------|-------|---|---|
| rrnAC0808 | -----MASR              | IR | VLAVV-----          | GLLL        | LAGC       | TGMGGSGDAG | A,B,- | - | - |
| rrnAC1293 | -----M                 | RK | GILTL-----          | LVGVLVV     | SSGC       | TGLITGETVA | A,B,- | - | - |
| rrnAC2079 | -----MT                | KR | KTIFS-----          | SVAIALLLII  | SGGC       | SGFVGGGEPV | A,B,- | - | - |
| rrnAC2645 | -----MVR               | PR | VESLA-----          | VAALLV      | LAGC       | GGFVANGVDS | A,B,- | - | - |
| rrnAC2720 | -----M                 | WR | VTLAV-----          | GIAL        | IAGC       | SSFFPTSPTA | A,B,- | - | - |
| rrnAC3140 | -----M                 | RW | GVFGV-----          | VVVLVV      | ATGC       | SGFAGSPSQS | A,B,- | - | - |
| rrnAC3358 | -----MA                | GR | IAVLL-----          | VLLL        | FAGC       | GAFGGAERQT | A,B,- | - | - |
| rrnAC3416 | -----M                 | TR | AVVAI-----          | VTLALV      | LAGC       | SGFVQQDSPE | A,B,- | - | - |
| OE3264F   | -----MR                | PR | IVLIA-----          | ALVVSSIA    | LAGC       | SGTQSGTPTA | A,B,C | - | - |
| OE2121F   | -----M                 | RA | LWVAL-----          | AVAALAV     | TAGC       | AGFGGPQSAA | A,B,- | - | - |
| OE2791R   | -----MVRDLHV           | PR | TALLA-----          | VGLAVLLV    | AAGC       | TGMPGGSSAD | A,B,- | - | - |
| OE3655R   | -----M                 | VR | SATIP-----          | LVLIALLA    | AAGC       | LGSPIMEPVR | A,B,- | - | - |
| HVO_0494  | -----MYS               | NR | IPVLL-----          | IAVLVL      | LAGC       | AGGADVAPAA | A,B,C | - | - |
| HVO_0807  | -----M                 | RV | SVLLA-----          | AALVL       | STGC       | LGGGSGTARL | A,B,C | - | - |
| HVO_1030  | -----M                 | KR | TGLAT-----          | VLLALMVV    | LAGC       | AGGAGTVTET | A,B,C | - | - |
| HVO_1580  | -----MSPAA             | DR | GIAPL-----          | ALALVLLVV   | LSGC       | TSSSPSPPVV | A,B,C | - | - |
| HVO_1807  | -----MAR               | FR | ALPLA-----          | ALAALAV     | LSGC       | VGVPADAPG  | A,B,C | - | - |
| HVO_2535  | -----MQPTA             | AR | VLLAA-----          | LMVL        | LAGC       | GGGVGGDATT | A,B,C | - | - |
| HVO_1609  | -----MD                | NR | LKLLS-----          | VALLVV      | LAGC       | TGGAADGGAG | A,B,- | - | - |
| HVO_1808  | -----MRTTG             | LR | AVFAA-----          | VLLV        | LAGC       | AAPTAAPGGD | A,B,- | - | - |
| HQ1800A   | -----M                 | AR | TPIIV-----          | AGVVFLLM    | IAGC       | SAPTAPGPDD | A,B,C | - | - |
| Nmag_2608 | -----M                 | RQ | LAALL-----          | LVALLV      | SAGC       | SAFDSSPDGD | A,B,C | - | - |
| Nmag_4102 | -----M                 | KR | LLLTV-----          | LVAAMLV     | LAGC       | ADGAGTDTDE | A,B,C | - | - |
| NP5284A   | -----M                 | RI | NVAAF-----          | AVLAVVV     | TAGC       | AGALLGEDLD | A,B,- | - | - |
| OE3125R   | -----M                 | PK | YSTGG-----          | AGSGGG      | GQAC       | ELCGSTADSL | A,B,- | - | - |
| HQ1883A   | -----MT                | TK | EESTN-KLIEQALTATTIA | VIGC        | STSPGKPAHD | A,-,C      | -     | - | - |
| Nmag_2200 | -----MTKRQGSNSQQVGRGLR | TR | VRSLP---            | LGLVAVLFLVV | LAGC       | TLPASPDQFG | -,B,C | - | - |
| NP4668A   | -----M                 | KL | NVVGSG-----         | GYVGTT      | LAAC       | LAEMGHNVSA | A,B,- | - | - |
