# Supplementary material for: Mutational and Bioinformatic Analysis of Haloarchaeal Lipobox-Containing Proteins
Source: Hindawi journal article supplement (doi:10.1155/2010/410975), 2010-01-01
Supplement: f5 [file 410975.f5.pdf]

### Supplementary Table 5: position-specific amino acid frequencies

The position-specific amino acid frequency is computed for the 484 lipoproteins from 6 halophilic archaea. The row “all” is the average over the N-terminal region of the proteins, including ten residues after the conserved Cys, but excluding the initiator methionine, the twin-Arg and the lipobox motif. Position 1 is the first amino acid after the twin-Arg motif, which occurs in the 400 TatFind positives and an additional 50 TatFind negatives. The twin-Arg motif and the lipobox motif were juxtaposed by introducing a gap of variable length between positions 5 and 6 after the twin-Arg motif. Accordingly, the number of sequences is below 484 for positions 6-16. The data for positions 6-10 are not shown as the number of sequences is too low (1, 2, 11, 26, 30, respectively). The second Arg of the twin-Arg motif corresponds to pos 0 with positions immediately following (postRR). The lipobox motif is at positions 20-23 (LAGC). Amino acids relevant for the TatLipo algorithm are color-coded: (a) required (green; pos. 23 Cys); (b) frequent (blue; pos. 20 L,V,I,F; pos. 21 A; pos. 22 G; pos. 24 L,S; pos. 25 D,G;) (c) excluded (red; pos. 16-20 D,E,R,K,H,N,Q; pos. 21 C,D,E,R,K,H,N,Q,P; pos. 22 C,D,E,R,K,H; pos. 23 all amino acids except G,A,S; pos. 24 all amino acids except Cys; pos. 25 C,D; pos. 26 C) (d) tolerated (yellow, pos. 14-15 D,E,R,K,H,N,Q; pos. 20 W,Y; pos. 21 L,M,N,F,Y,W; pos. 22 S; pos. 24 E,K,Y,W; pos. 25 K,P,W) (e) normal (black).

| region     | # seqs | C   | D   | E   | G    | A    | V    | I    | L    | F    | Y    | W   | M   | R    | H   | K    | S    | T    | N   | Q   | P   |
|------------|--------|-----|-----|-----|------|------|------|------|------|------|------|-----|-----|------|-----|------|------|------|-----|-----|-----|
| all -      | -      | 0.5 | 6.6 | 3.9 | 15.8 | 14.9 | 6.9  | 2.6  | 10.3 | 2.4  | 0.8  | 0.2 | 0.8 | 3.1  | 0.7 | 1.5  | 11.1 | 9.9  | 2.9 | 2.1 | 3.1 |
| 1 postRR   | 484    | 0.2 | 5.6 | 7.0 | 5.4  | 8.7  | 2.3  | 1.4  | 3.7  | 0.4  | 0.6  | 0   | 0.2 | 16.1 | 1.4 | 4.8  | 9.5  | 19.6 | 3.1 | 8.9 | 1.0 |
| 2 postRR   | 484    | 0.6 | 0   | 0.4 | 0.2  | 6.0  | 18.8 | 3.9  | 20.2 | 32.4 | 10.7 | 0.6 | 2.1 | 0.2  | 0.2 | 0.2  | 1.0  | 1.9  | 0   | 0   | 0.4 |
| 3 postRR   | 484    | 0.2 | 0   | 0   | 1.2  | 3.7  | 8.9  | 10.1 | 71.5 | 0.6  | 0    | 0   | 1.0 | 0.2  | 0   | 0    | 1.0  | 1.0  | 0   | 0   | 0.4 |
| 4 postRR   | 484    | 0.2 | 0   | 0.8 | 10.7 | 30.0 | 4.3  | 1.4  | 5.6  | 0.2  | 0    | 0.2 | 0.6 | 8.5  | 1.2 | 14.9 | 7.2  | 8.7  | 0   | 5   | 0.4 |
| 5 postRR   | 484    | 0.6 | 0   | 0   | 13.0 | 31.8 | 6.6  | 2.9  | 11.0 | 1.0  | 1.7  | 0.2 | 1.4 | 1.7  | 0.2 | 0.4  | 13.2 | 12.8 | 0.2 | 0.8 | 0.4 |
| 11 preLAGC | 105    | 1.0 | 0   | 0   | 21.0 | 26.7 | 3.8  | 8.6  | 6.7  | 0    | 0    | 0   | 1.0 | 0    | 0   | 0    | 8.6  | 21.9 | 0   | 1   | 0   |
| 12 preLAGC | 357    | 1.7 | 0   | 0   | 22.4 | 23.0 | 13.2 | 7.0  | 10.6 | 1.4  | 0    | 0   | 0.8 | 0    | 0   | 0    | 9.0  | 10.9 | 0   | 0   | 0   |

|    |          |     |       |      |      |      |      |      |     |      |     |     |     |     |     |     |     |      |      |     |     |     |
|----|----------|-----|-------|------|------|------|------|------|-----|------|-----|-----|-----|-----|-----|-----|-----|------|------|-----|-----|-----|
| 13 | preLAGC  | 424 | 0.7   | 0    | 0    | 40.1 | 29.0 | 5.2  | 1.9 | 6.1  | 0.5 | 0   | 0   | 0   | 0   | 0   | 0   | 8.3  | 8.3  | 0   | 0   | 0   |
| 14 | preLAGC  | 448 | 1.1   | 0    | 0    | 12.7 | 30.6 | 19.9 | 3.8 | 8.7  | 0.2 | 0   | 0   | 0.2 | 0   | 0   | 0   | 6.5  | 15.0 | 0   | 0   | 1.3 |
| 15 | preLAGC  | 469 | 1.1   | 0    | 0    | 21.7 | 37.3 | 13.0 | 3.2 | 8.3  | 0.6 | 0.2 | 0   | 0.4 | 0   | 0   | 0   | 6.2  | 7.5  | 0   | 0   | 0.4 |
| 16 | preLAGC  | 483 | 0.4   | 0    | 0    | 28.8 | 28.6 | 10.1 | 0.6 | 14.9 | 2.3 | 0   | 0   | 0.2 | 0   | 0   | 0   | 7.7  | 6.0  | 0   | 0   | 0.4 |
| 17 | preLAGC  | 484 | 1.0   | 0    | 0    | 7.4  | 21.9 | 12.4 | 6.4 | 24.2 | 1.4 | 0   | 0   | 1.7 | 0   | 0   | 0   | 7.0  | 16.1 | 0   | 0   | 0.4 |
| 18 | preLAGC  | 484 | 0.2   | 0    | 0    | 13.6 | 33.7 | 18.8 | 4.3 | 10.3 | 2.7 | 0   | 0   | 0.4 | 0   | 0   | 0   | 5.8  | 9.9  | 0   | 0   | 0.2 |
| 19 | preLAGC  | 484 | 0.2   | 0    | 0    | 27.5 | 27.7 | 10.3 | 3.1 | 13.2 | 1.2 | 0   | 0   | 1.0 | 0   | 0   | 0   | 8.5  | 6.8  | 0   | 0   | 0.4 |
| 20 | LAGC     | 484 | 0     | 0    | 0    | 1.4  | 3.1  | 12.2 | 6.2 | 60.5 | 3.9 | 0   | 0   | 1.2 | 0   | 0   | 0   | 3.3  | 8.1  | 0   | 0   | 0   |
| 21 | LAGC     | 484 | 0     | 0    | 0    | 1.4  | 83.5 | 0.6  | 0.2 | 0    | 0   | 0   | 0   | 0   | 0   | 0   | 0   | 11.4 | 2.5  | 0   | 0.2 | 0.2 |
| 22 | LAGC     | 484 | 0     | 0    | 0    | 98.8 | 1.2  | 0    | 0   | 0    | 0   | 0   | 0   | 0   | 0   | 0   | 0   | 0    | 0    | 0   | 0   | 0   |
| 23 | LAGC     | 484 | 100.0 | 0    | 0    | 0    | 0    | 0    | 0   | 0    | 0   | 0   | 0   | 0   | 0   | 0   | 0   | 0    | 0    | 0   | 0   | 0   |
| 24 | postLAGC | 484 | 0     | 0    | 0.2  | 6.2  | 11.8 | 6.0  | 2.7 | 26.9 | 0.8 | 0   | 0   | 1   | 0.2 | 0.2 | 0   | 23.1 | 15.5 | 2.9 | 2.1 | 0.4 |
| 25 | postLAGC | 484 | 0     | 13.0 | 4.1  | 42.6 | 8.3  | 1.0  | 0.2 | 0.4  | 0.6 | 0.2 | 0   | 0.2 | 1.2 | 0.2 | 0   | 17.8 | 6.8  | 1.0 | 2.3 | 0   |
| 26 | postLAGC | 484 | 0.2   | 11.0 | 6.0  | 22.5 | 3.3  | 3.3  | 2.7 | 7.0  | 3.9 | 0.4 | 0   | 1.2 | 4.3 | 0.6 | 0.4 | 13.0 | 5.6  | 5.6 | 3.5 | 5.4 |
| 27 | postLAGC | 484 | 0.2   | 12.8 | 6.2  | 24.2 | 6.2  | 3.3  | 1.2 | 5.8  | 4.3 | 0.4 | 0.2 | 1.4 | 1.9 | 0   | 0   | 14.5 | 6.8  | 3.3 | 2.9 | 4.3 |
| 28 | postLAGC | 484 | 0.2   | 16.9 | 8.9  | 23.8 | 5.8  | 2.1  | 0.6 | 3.1  | 1.0 | 0   | 0.2 | 0.2 | 2.1 | 0.6 | 0   | 13.6 | 6.0  | 5.2 | 2.5 | 7.2 |
| 29 | postLAGC | 484 | 0.2   | 14.0 | 11.8 | 21.9 | 8.3  | 1.7  | 0   | 1.4  | 0.6 | 0.8 | 0   | 0.2 | 2.3 | 0.2 | 0.6 | 16.5 | 8.1  | 3.5 | 2.7 | 5.2 |
| 30 | postLAGC | 484 | 0     | 17.4 | 10.7 | 16.1 | 6.2  | 2.1  | 0.6 | 2.1  | 1.4 | 0.2 | 0.2 | 0.4 | 2.5 | 0.4 | 0.4 | 14.7 | 6.8  | 7.2 | 2.7 | 7.9 |
| 31 | postLAGC | 484 | 0.2   | 16.7 | 9.7  | 17.4 | 8.9  | 3.9  | 1.2 | 1.2  | 0.4 | 0.2 | 0.2 | 0   | 1.9 | 0   | 0.4 | 13.4 | 11.0 | 3.1 | 2.3 | 7.9 |
| 32 | postLAGC | 484 | 0.2   | 14.7 | 11.8 | 15.1 | 6.6  | 3.3  | 1.4 | 1.4  | 0.6 | 0.6 | 0   | 0.6 | 2.1 | 1.0 | 0.6 | 11.4 | 11.2 | 5.6 | 2.9 | 8.9 |
| 33 | postLAGC | 484 | 0     | 14.0 | 12.4 | 14.5 | 8.7  | 2.9  | 1.4 | 3.9  | 0.6 | 0.6 | 0.4 | 0.2 | 2.7 | 0.6 | 0.8 | 10.1 | 13.2 | 4.5 | 1.9 | 6.4 |
